# Supplementary material for: A study on the AMACR catalysed elimination reaction and its application to inhibitor testing
Source: Royal Society of Chemistry journal article supplement (doi:10.1039/c5ob01541c), 2015-10-27
Supplement: c5ob01541c1.pdf [file c5ob01541c1.pdf]

Supplementary Information

**A study on the AMACR catalysed elimination reaction and its application to  
inhibitor testing**

Maksims Yevglevskis,<sup>a</sup> Guat L. Lee,<sup>a</sup> Jenny Sun,<sup>a,b</sup> Shiyi Zhao,<sup>a,b</sup> Xiaolong Sun,<sup>c</sup> Gabriele Kociok-Köhn,<sup>c</sup> Tony D. James,<sup>c</sup> Timothy J. Woodman,<sup>a</sup> and Matthew D. Lloyd<sup>a</sup>

<sup>a</sup>*Medicinal Chemistry, Department of Pharmacy & Pharmacology, University of Bath, Claverton Down, Bath BA2 7AY, United Kingdom.*

<sup>b</sup>*Department of Pharmacy, Shandong University, People's Republic of China.*

<sup>c</sup>*Department of Chemistry, University of Bath, Claverton Down, Bath BA2 7AY, United Kingdom.*

Abbreviations used: CoA, coenzyme A; DMSO, dimethylsulfoxide; HEPES, 4-(2-hydroxyethyl)-1-piperazineethane sulfonic acid; Tris, Tris(hydroxymethyl)methylamine

## Contents

|                                                                     |    |
|---------------------------------------------------------------------|----|
| $^1\text{H}$ , $^{13}\text{C}$ and $^{19}\text{F}$ NMR spectra..... | 3  |
| Single Crystal X-ray Crystallographic Data.....                     | 26 |
| Fluorescence Experimental Procedures.....                           | 31 |

Figure S1.  $^1\text{H}$  NMR spectrum of N-Dodecyl-N-methyl-carbamoyl-CoA (**8**)

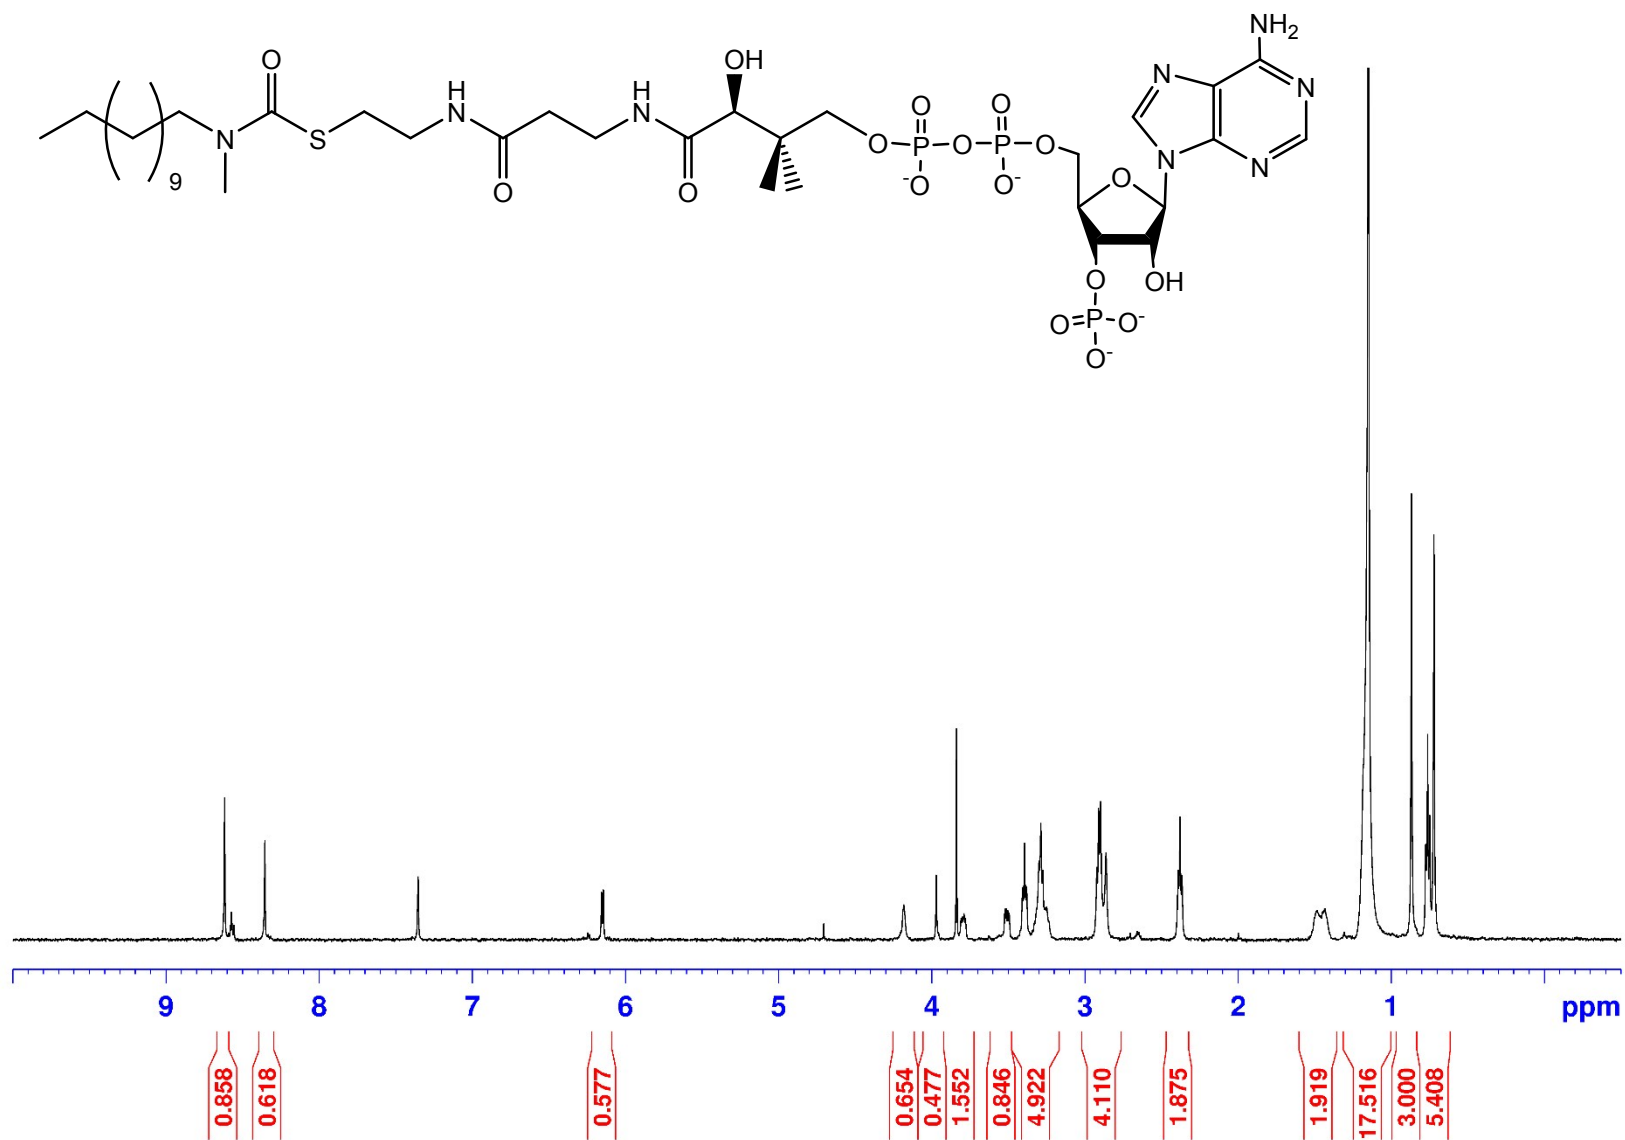

Figure S2.  $^1\text{H}$  NMR spectrum of (*R*)-4-Benzyl-3-[(2*S*,3*S*)-3-fluoro-2-methyl-3-phenylpropanoyl]oxazolidin-2-one (**15**) mixture of diastereoisomers

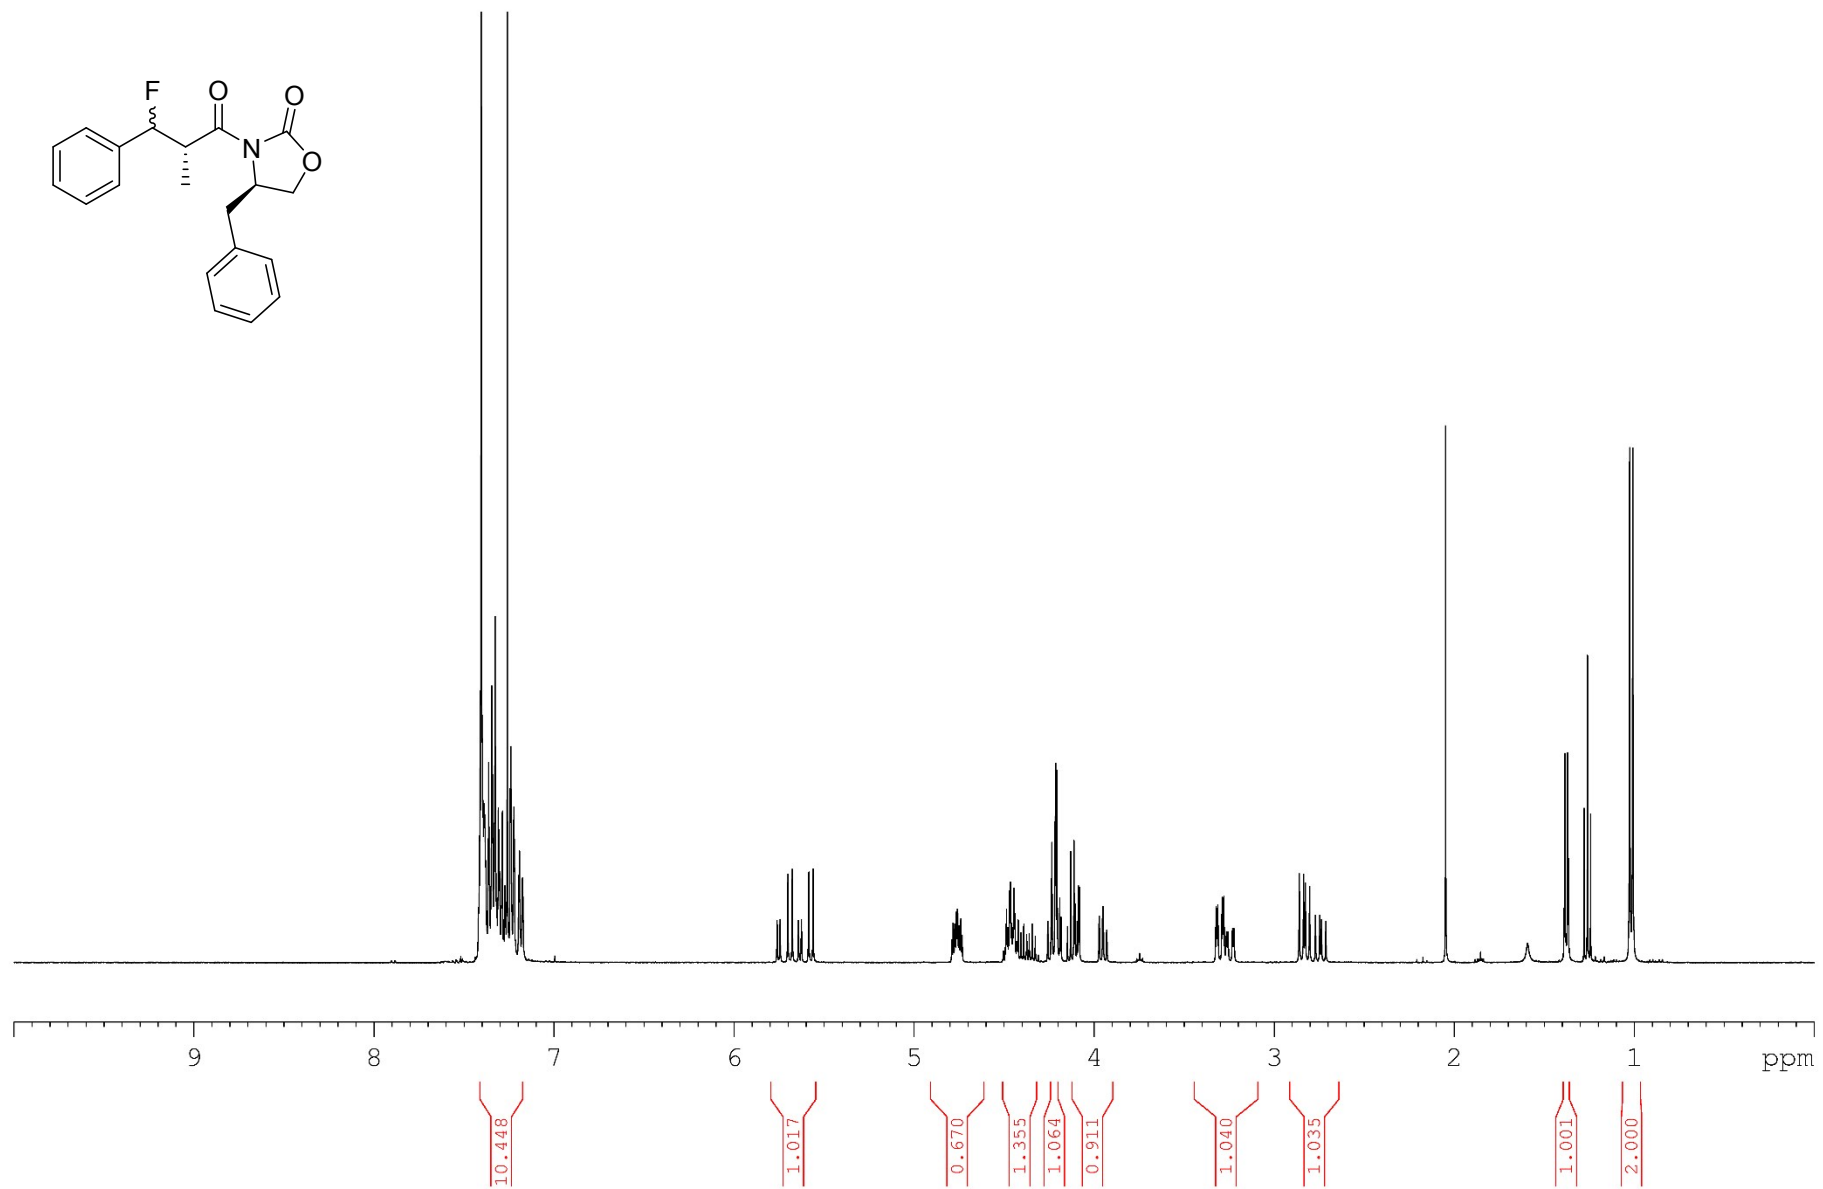

Figure S3.  $^1\text{H}$  NMR spectrum of (2*S*,3*S*)-Methyl-3-fluoro-2-methyl-3-phenylpropanoate (**17**) mixture of diastereoisomers

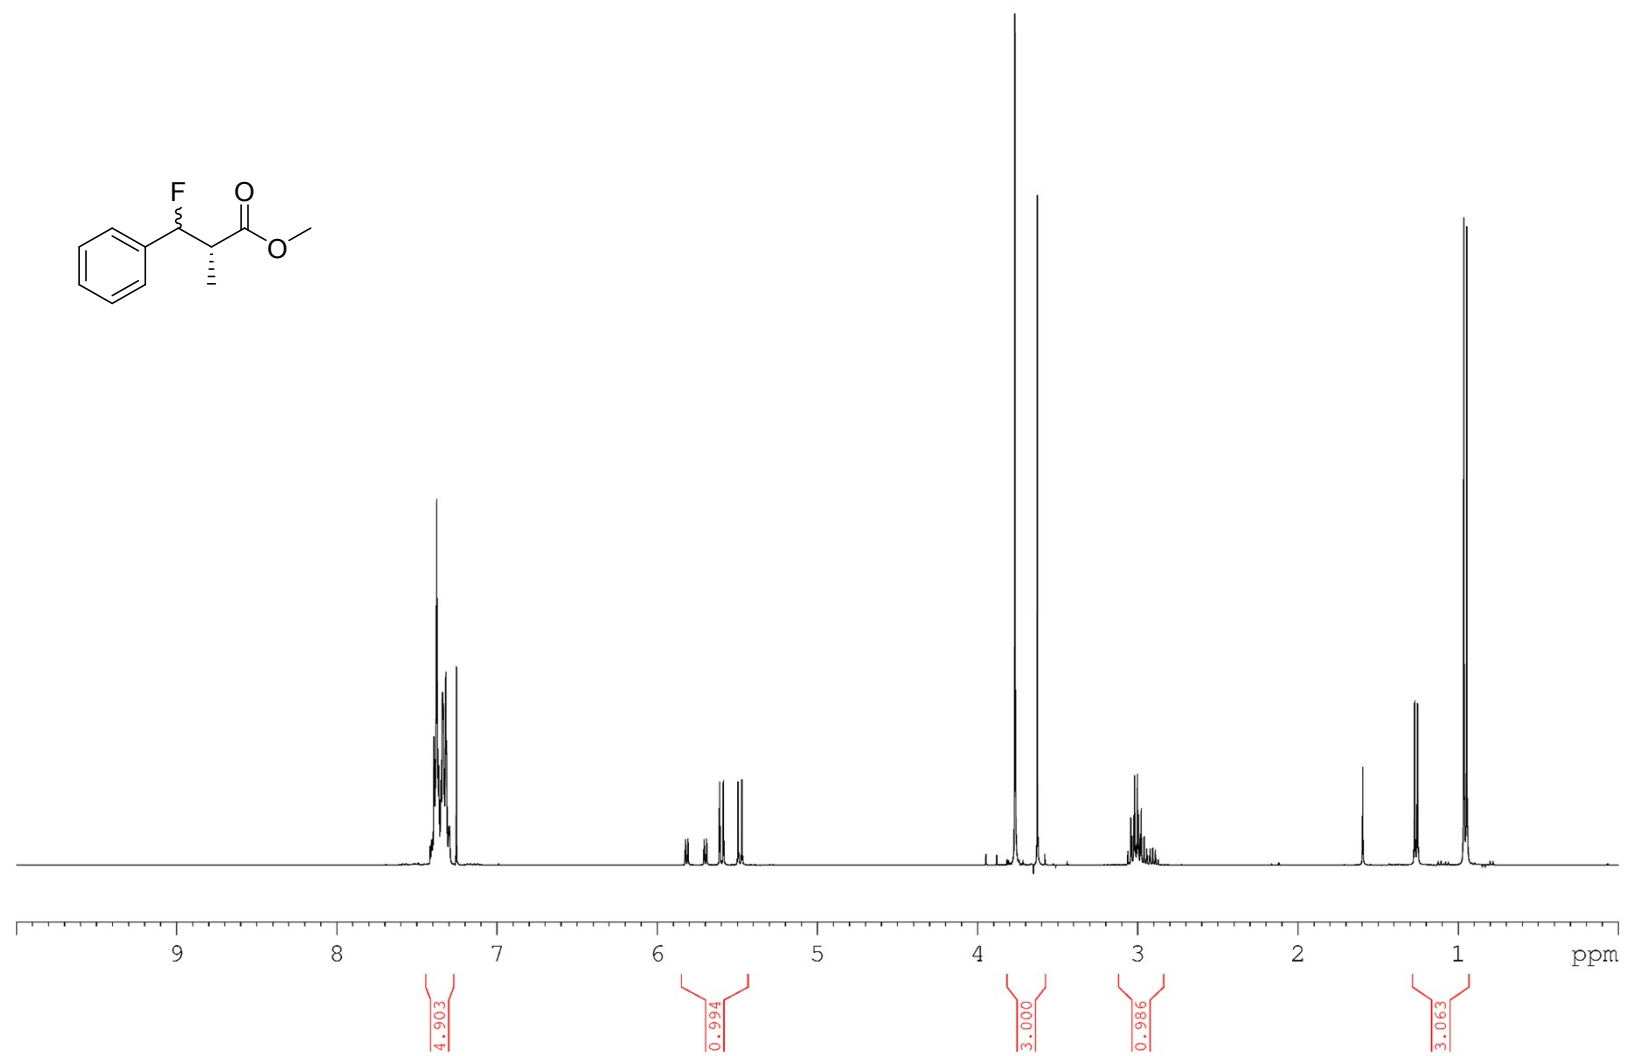

Figure S4.  $^1\text{H}$  NMR spectrum of (S)-4-Benzyl-3-[(2S,3S)-3-hydroxy-2-methyl-3-(4-nitrophenyl)propanoyl]-oxazolidin-2-one (**20**)

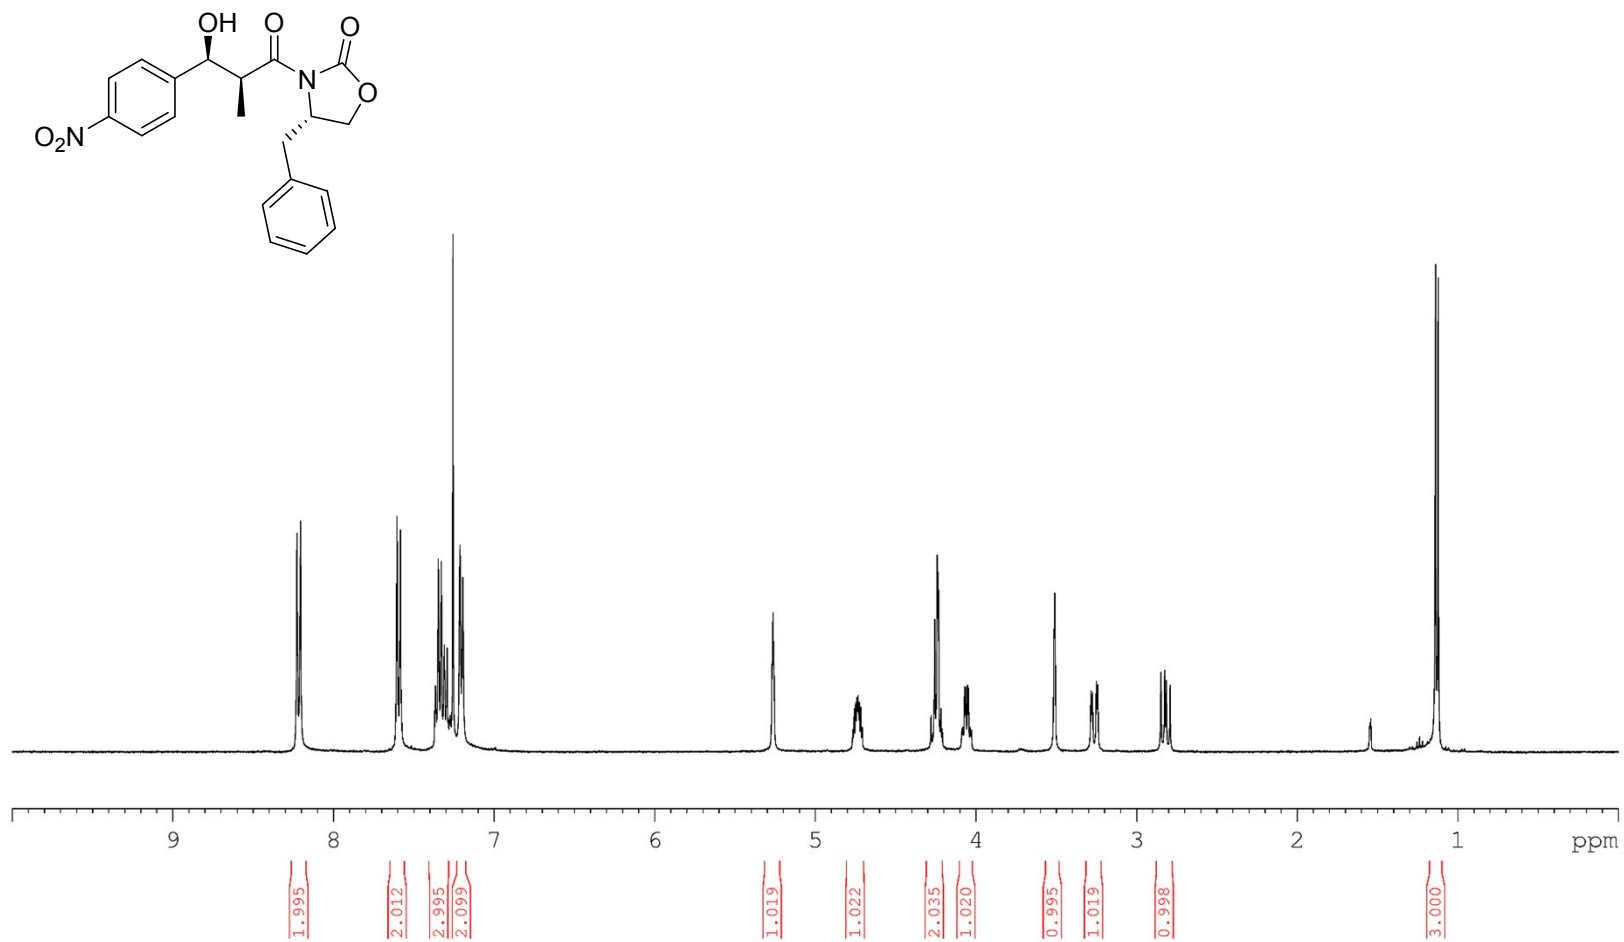

Figure S5.  $^{13}\text{C}$  NMR spectrum of (*S*)-4-Benzyl-3-[(2*S*,3*S*)-3-hydroxy-2-methyl-3-(4-nitrophenyl)propanoyl]-oxazolidin-2-one (**20**)

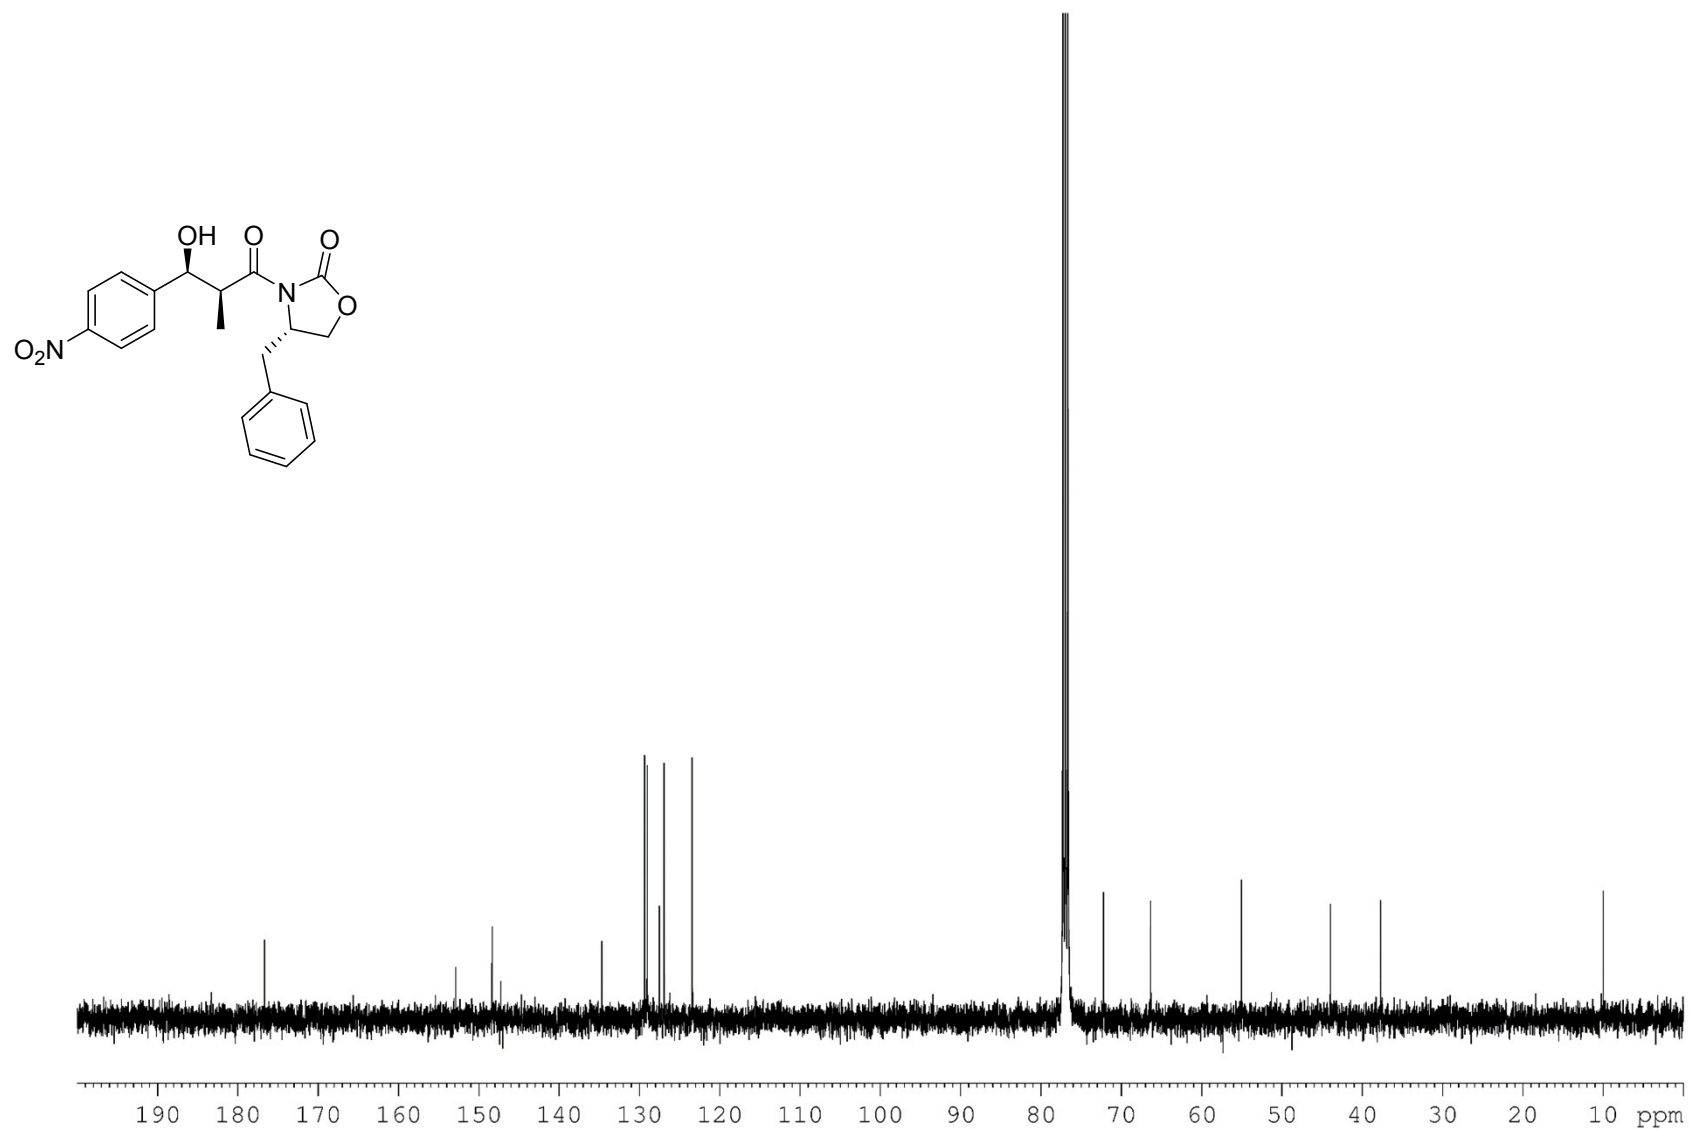

Figure S6.  $^1\text{H}$  NMR spectrum of (2*S*,3*S*)-Methyl 3-hydroxy-2-methyl-3-(4-nitrophenyl)propanoate (**21**)

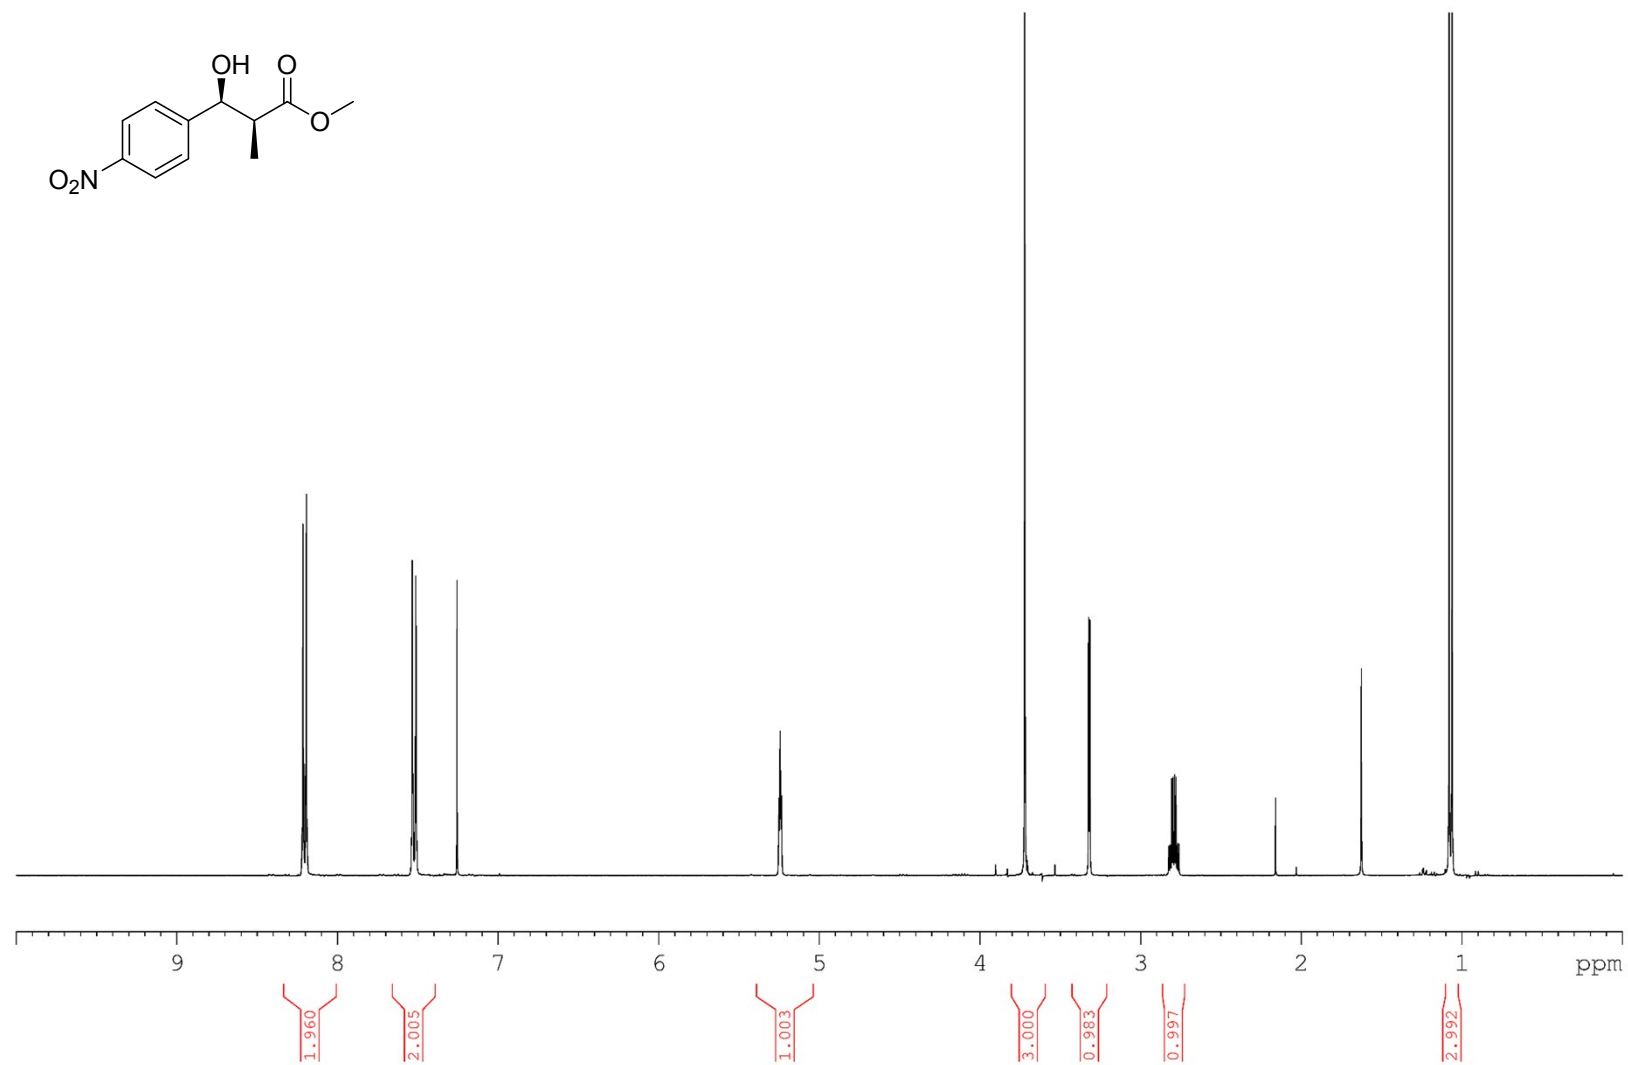



Figure S7.  $^1\text{H}$  NMR spectrum of (2*R*,3*S*)-Methyl-3-fluoro-2-methyl-3-(4-nitrophenyl)propanoate (**22**) mixture of diastereoisomers

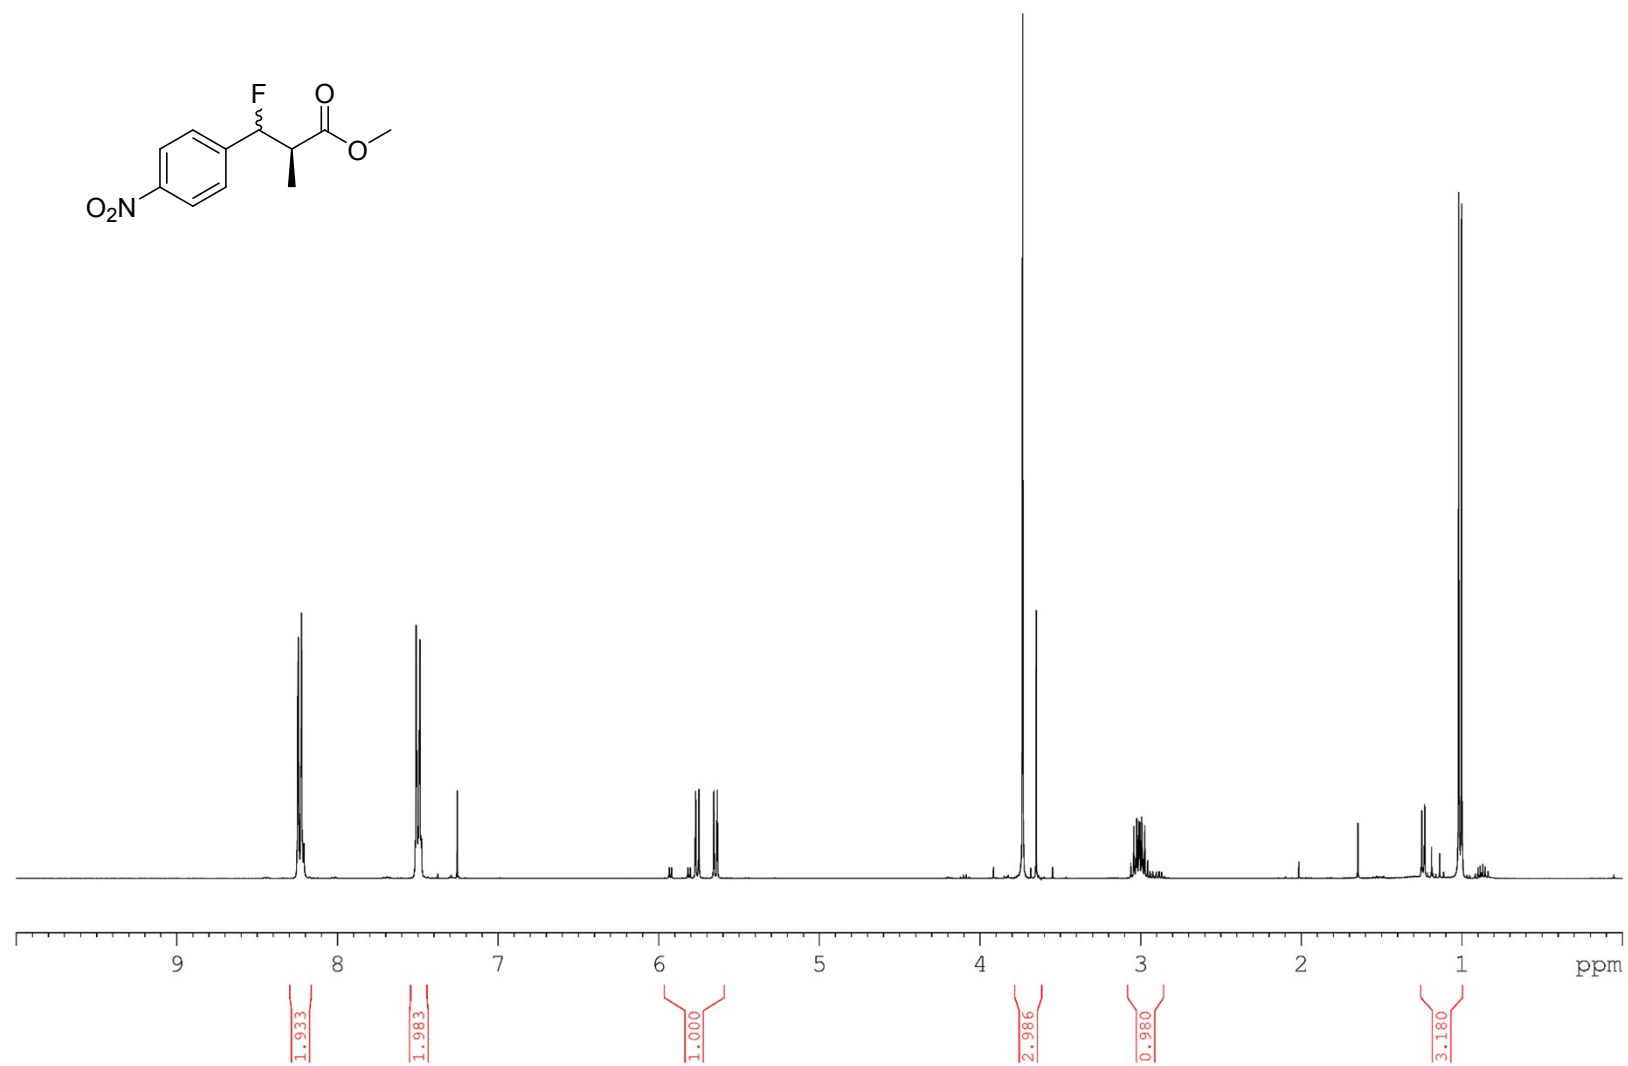

Figure S8.  $^1\text{H}$  NMR spectrum of *syn-tert*-Butyl 3-hydroxy-2-methyl-3-(4-nitrophenyl)propanoate (**24**)

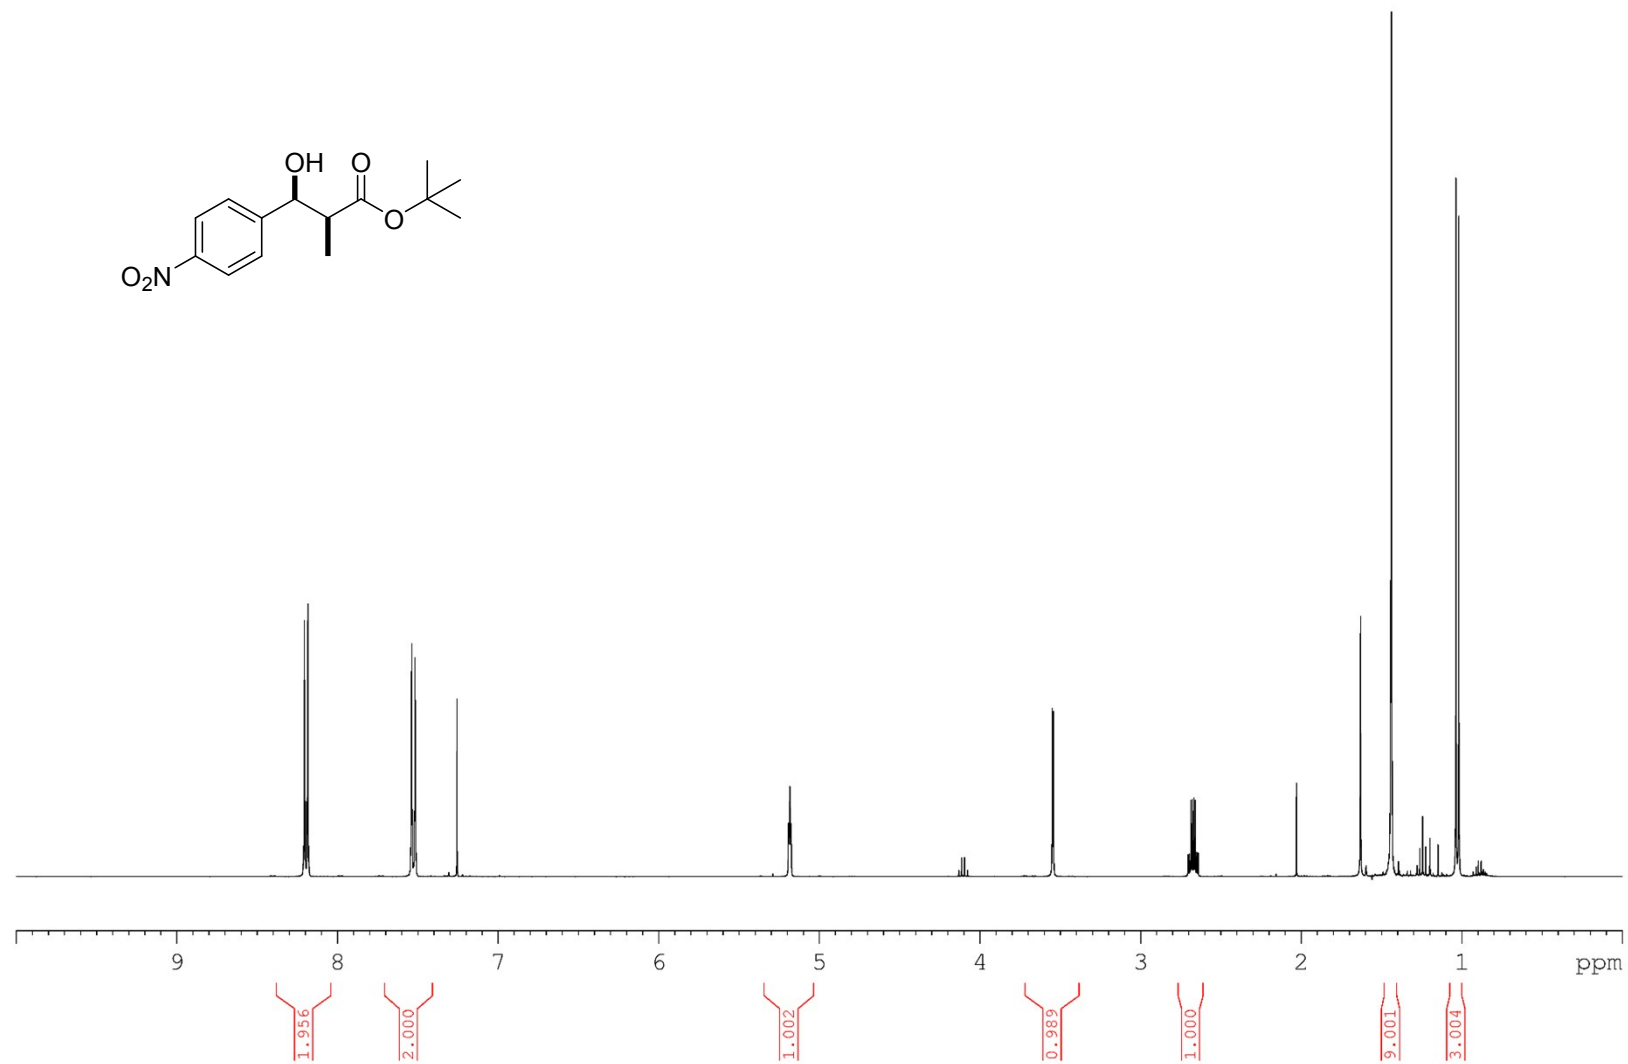

Figure S9.  $^{13}\text{C}$  NMR spectrum of *syn-tert*-Butyl 3-hydroxy-2-methyl-3-(4-nitrophenyl)propanoate (**24**)

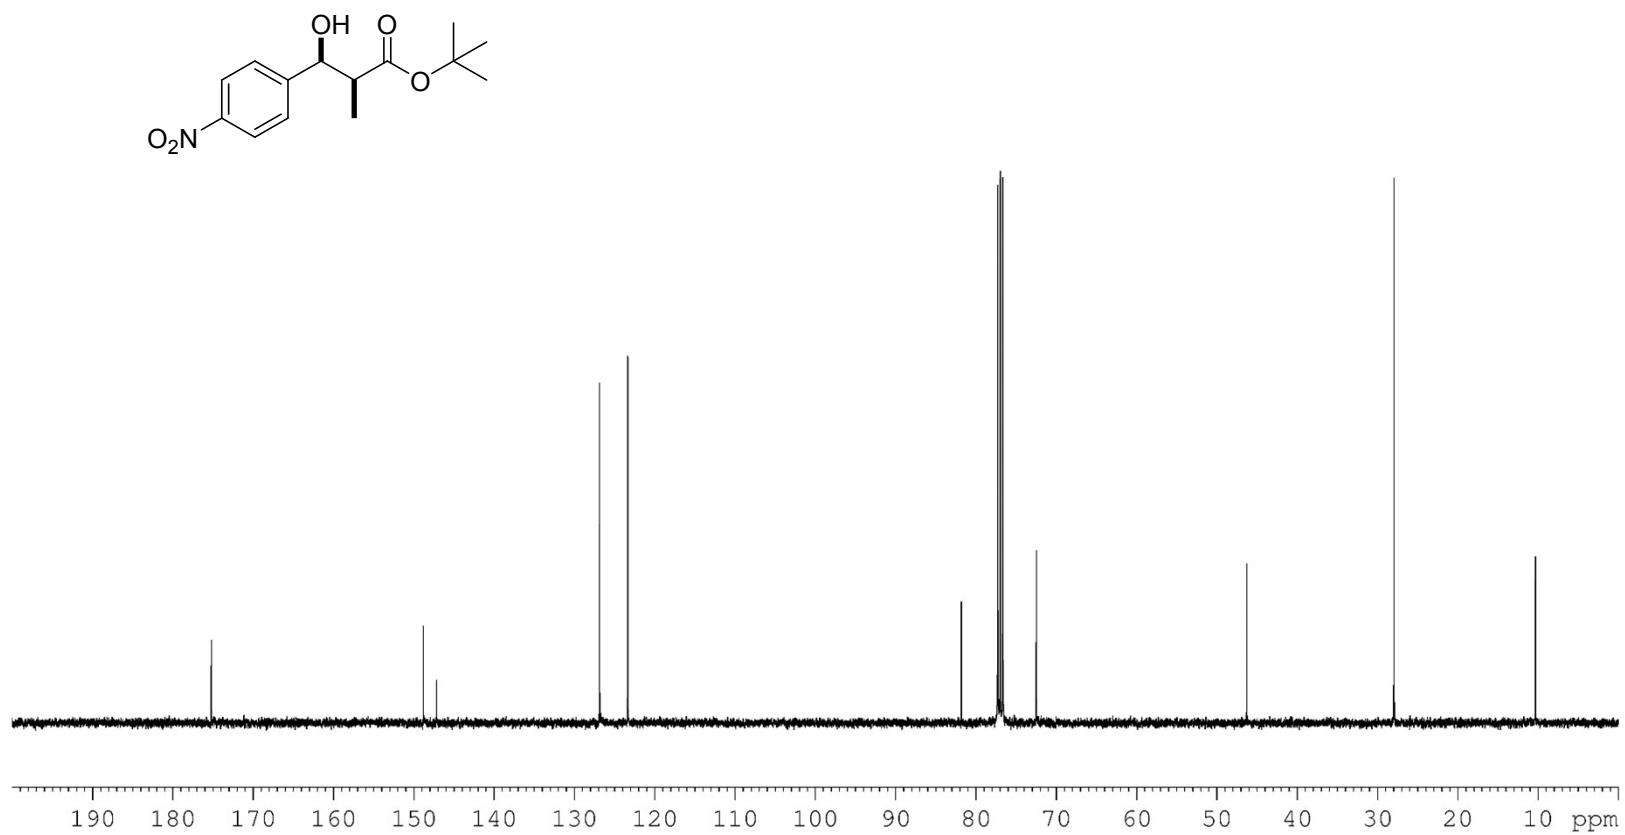

Figure S10.  $^1\text{H}$  NMR spectrum of *anti-tert*-Butyl 3-fluoro-2-methyl-3-(4-nitrophenyl)propanoate (**25**)

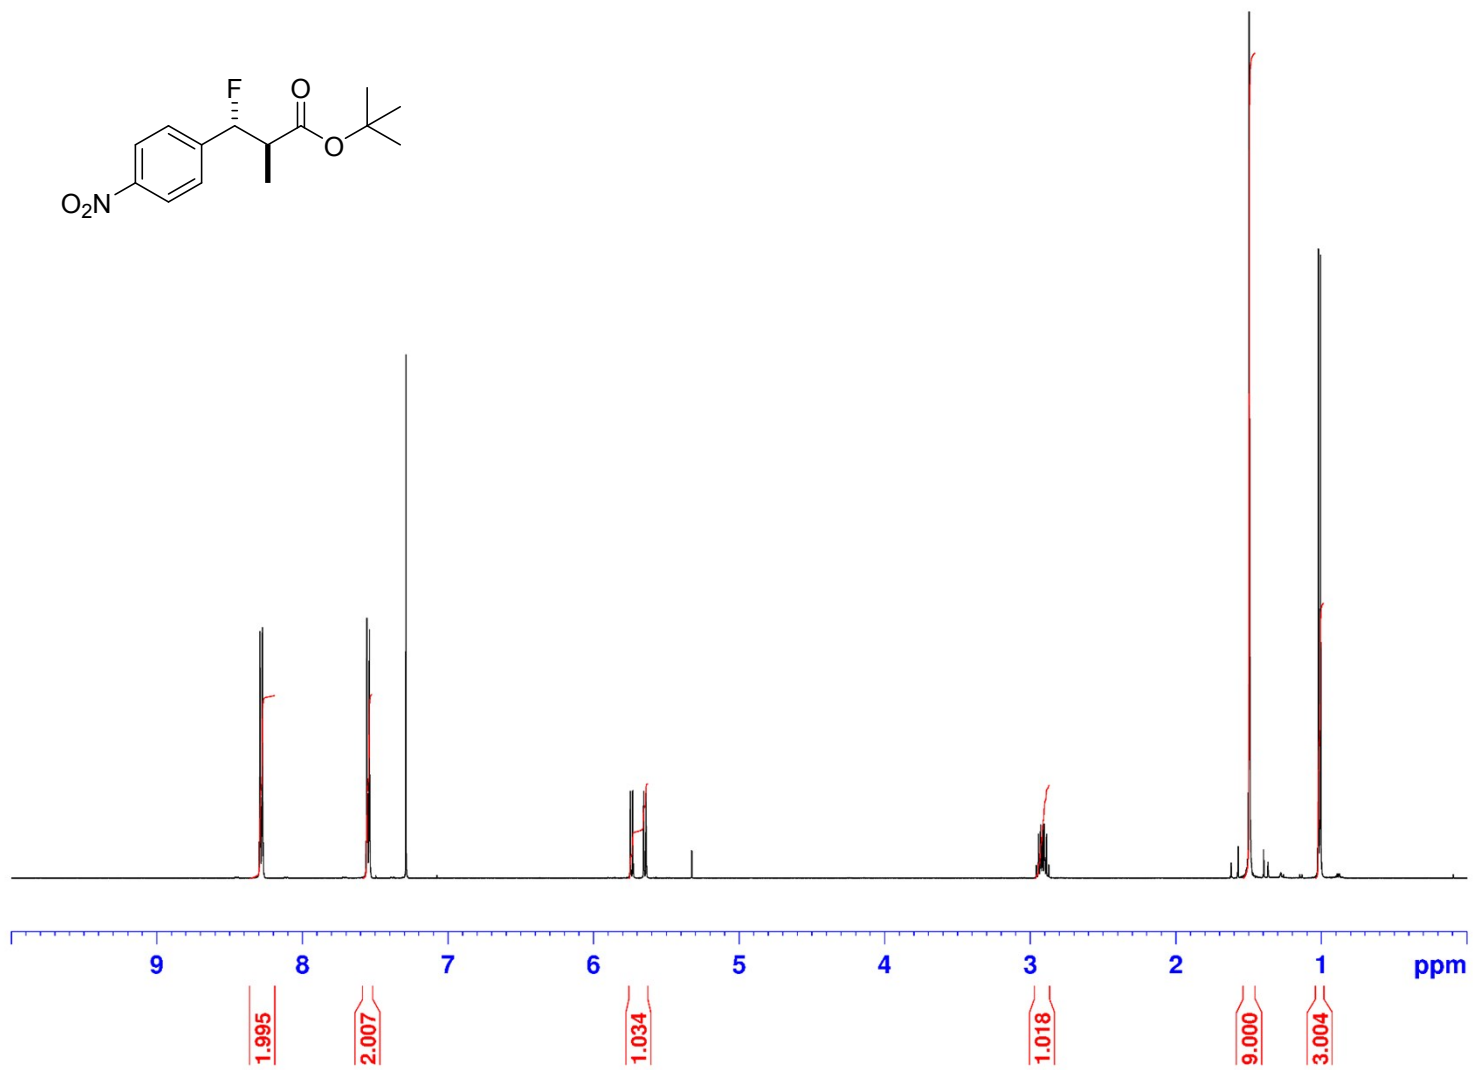

Figure S11.  $^{13}\text{C}$  NMR spectrum of *anti-tert*-Butyl 3-fluoro-2-methyl-3-(4-nitrophenyl)propanoate (**25**)

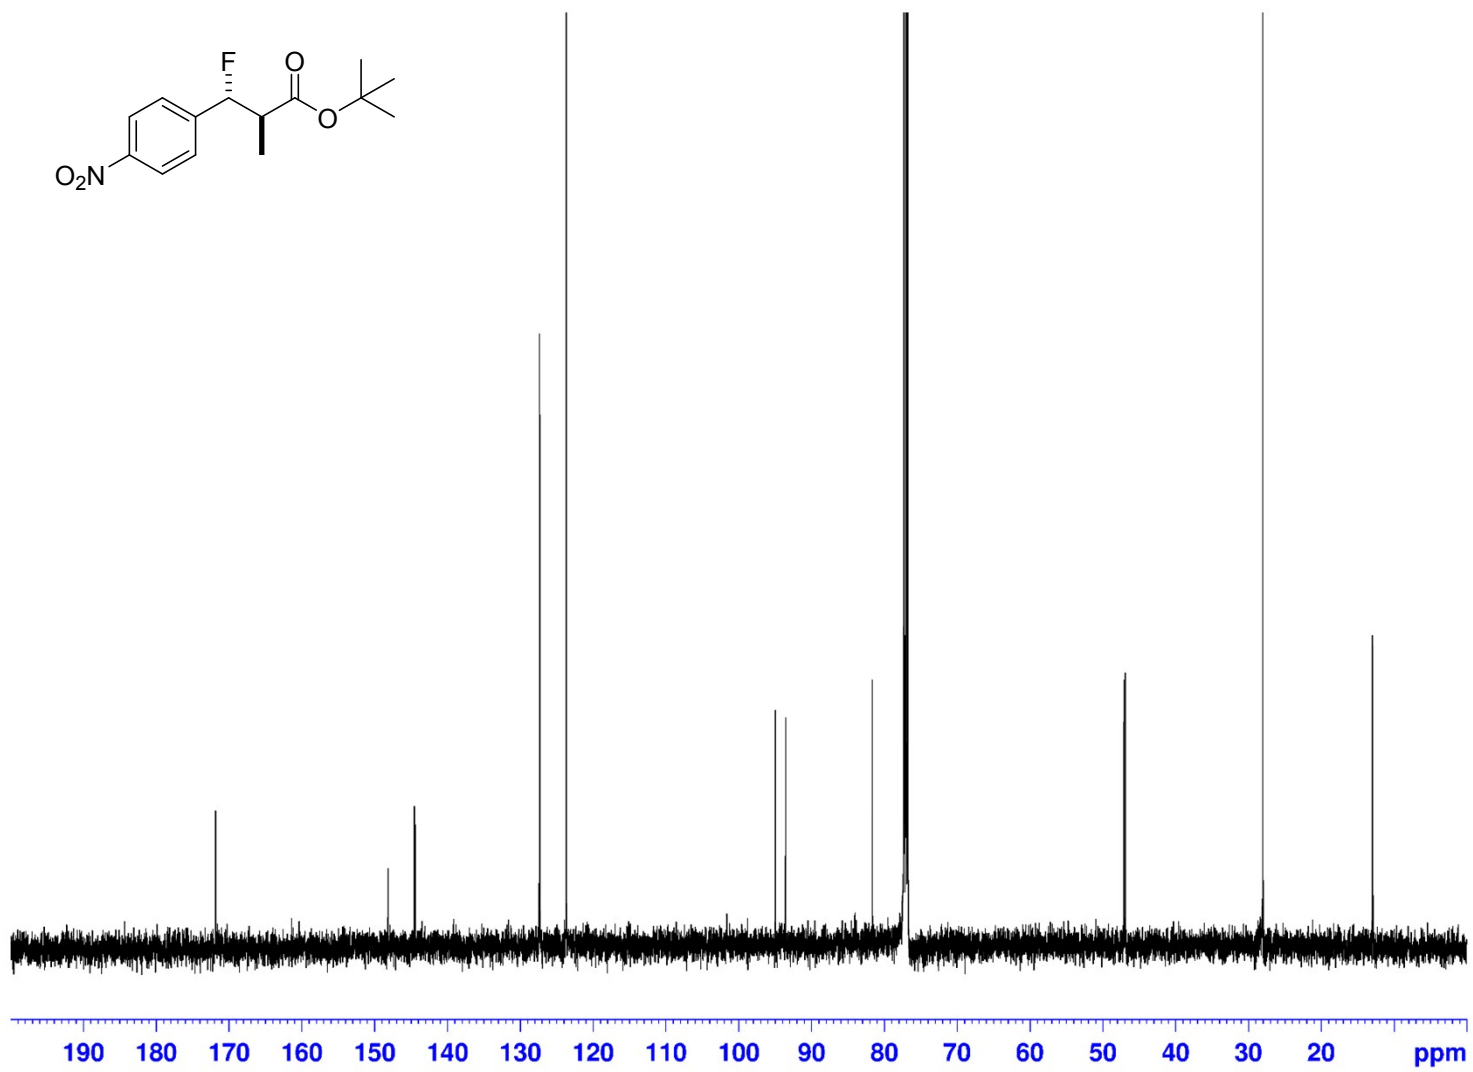

Figure S12.  $^{19}\text{F}$  NMR spectrum of *anti-tert*-Butyl 3-fluoro-2-methyl-3-(4-nitrophenyl)propanoate (**25**)

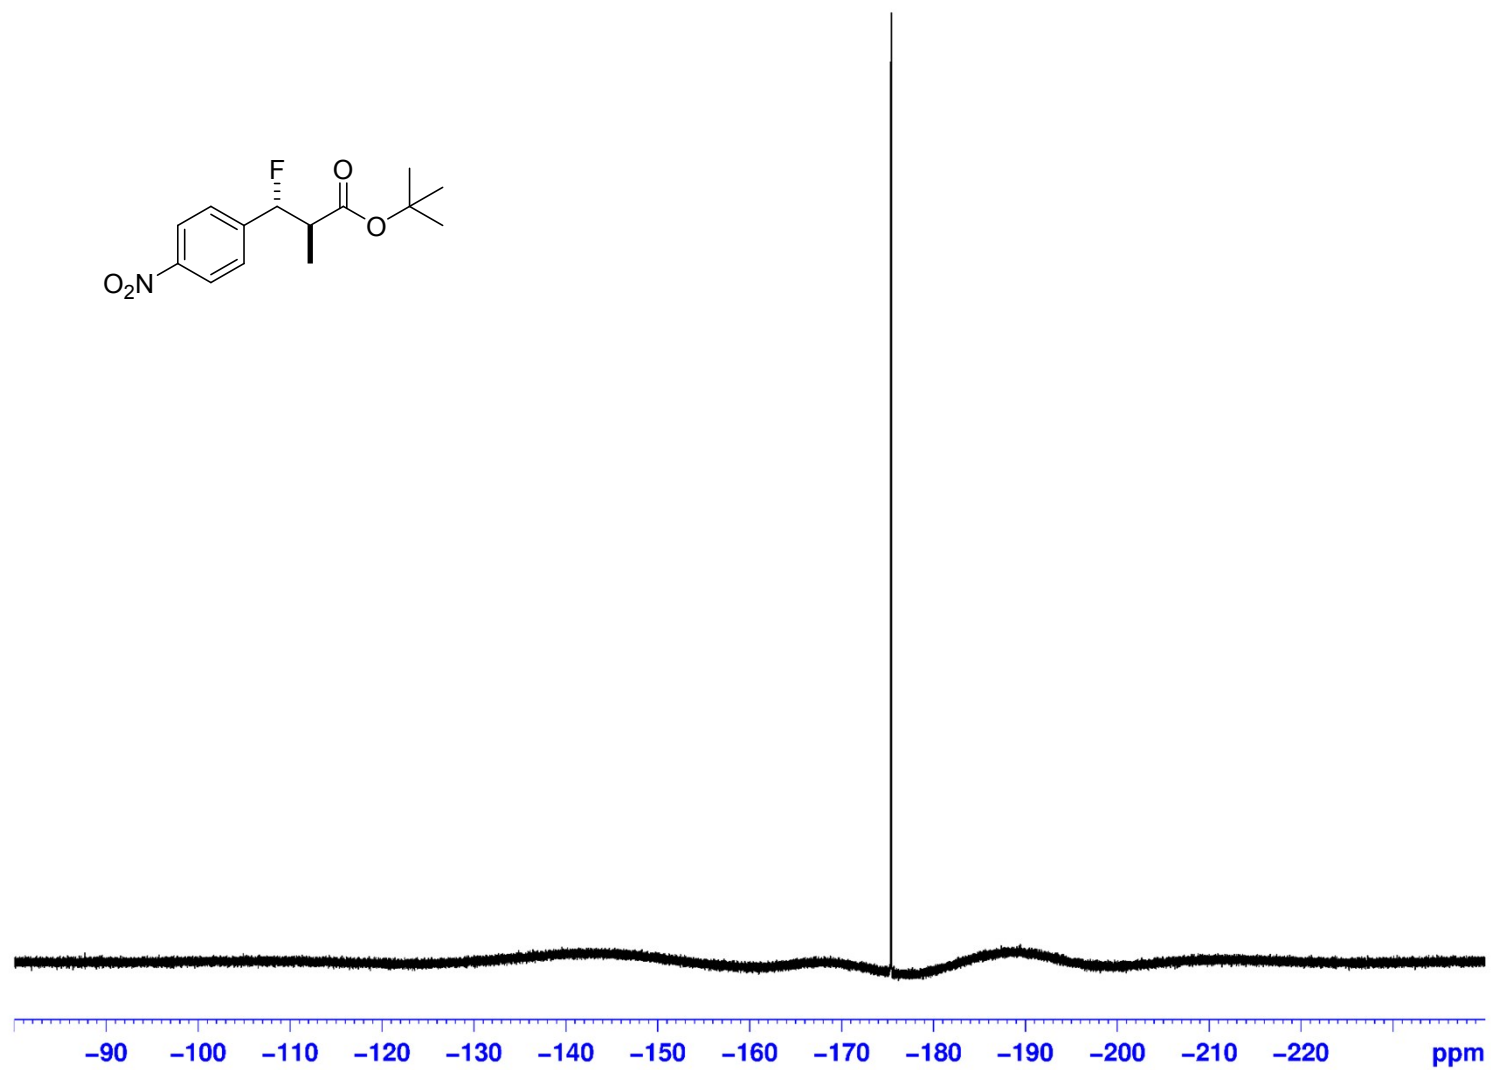

Figure S13.  $^1\text{H}$  NMR spectrum of *syn*-Benzyl 3-hydroxy-2-methyl-3-(4-nitrophenyl)propanoate (**27**)

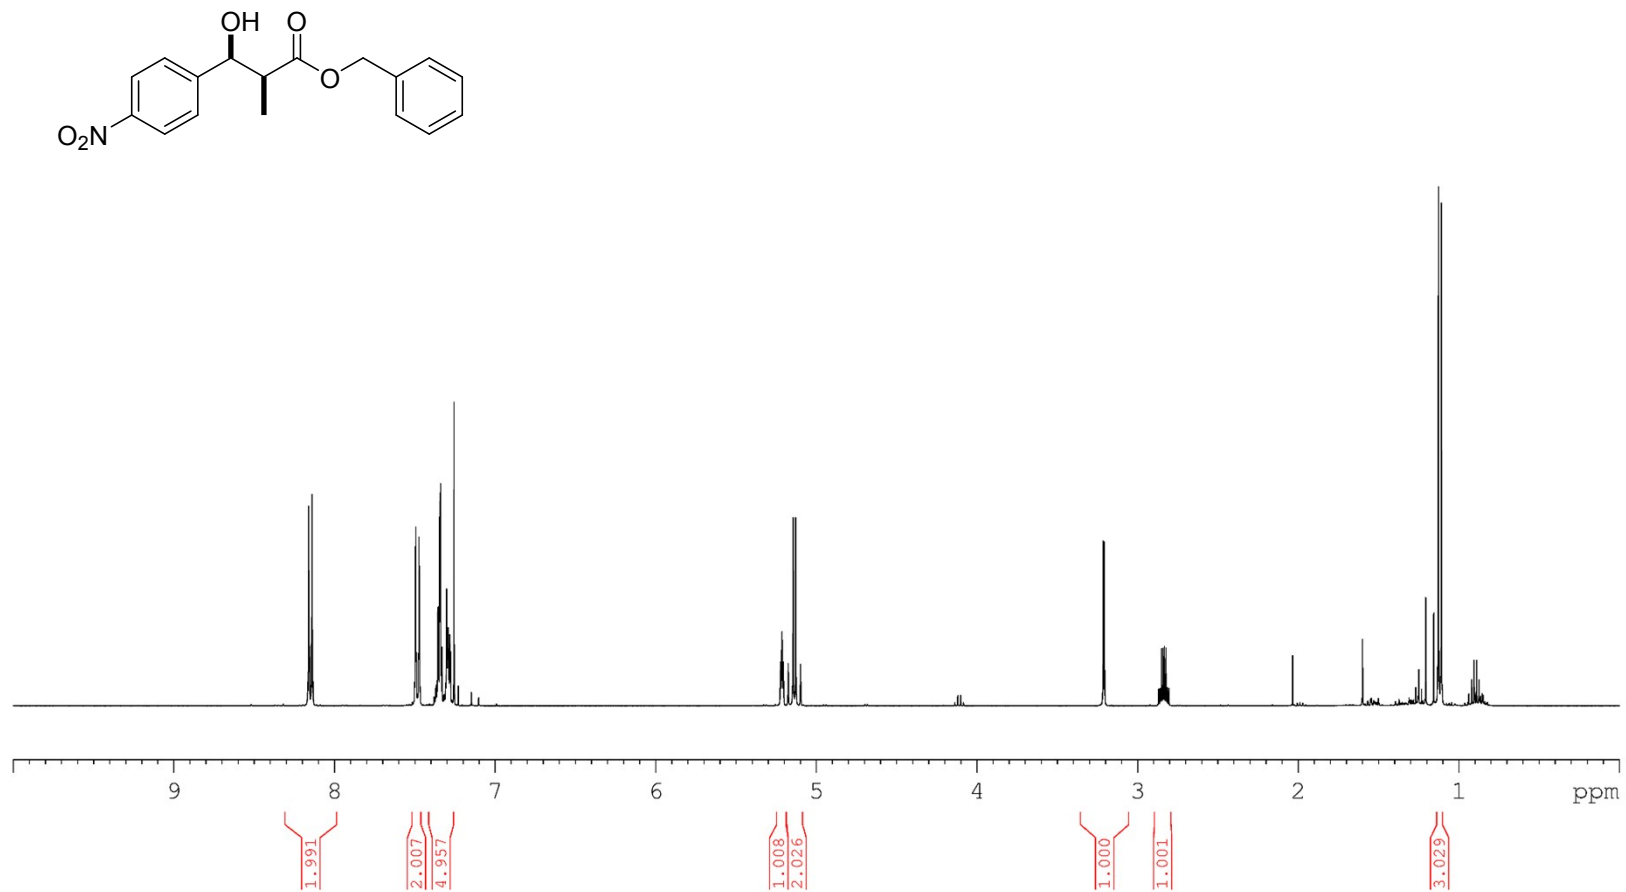

Figure S14.  $^1\text{H}$  NMR spectrum of *anti*-Benzyl 3-fluoro-2-methyl-3-(4-nitrophenyl)propanoate (**28**)

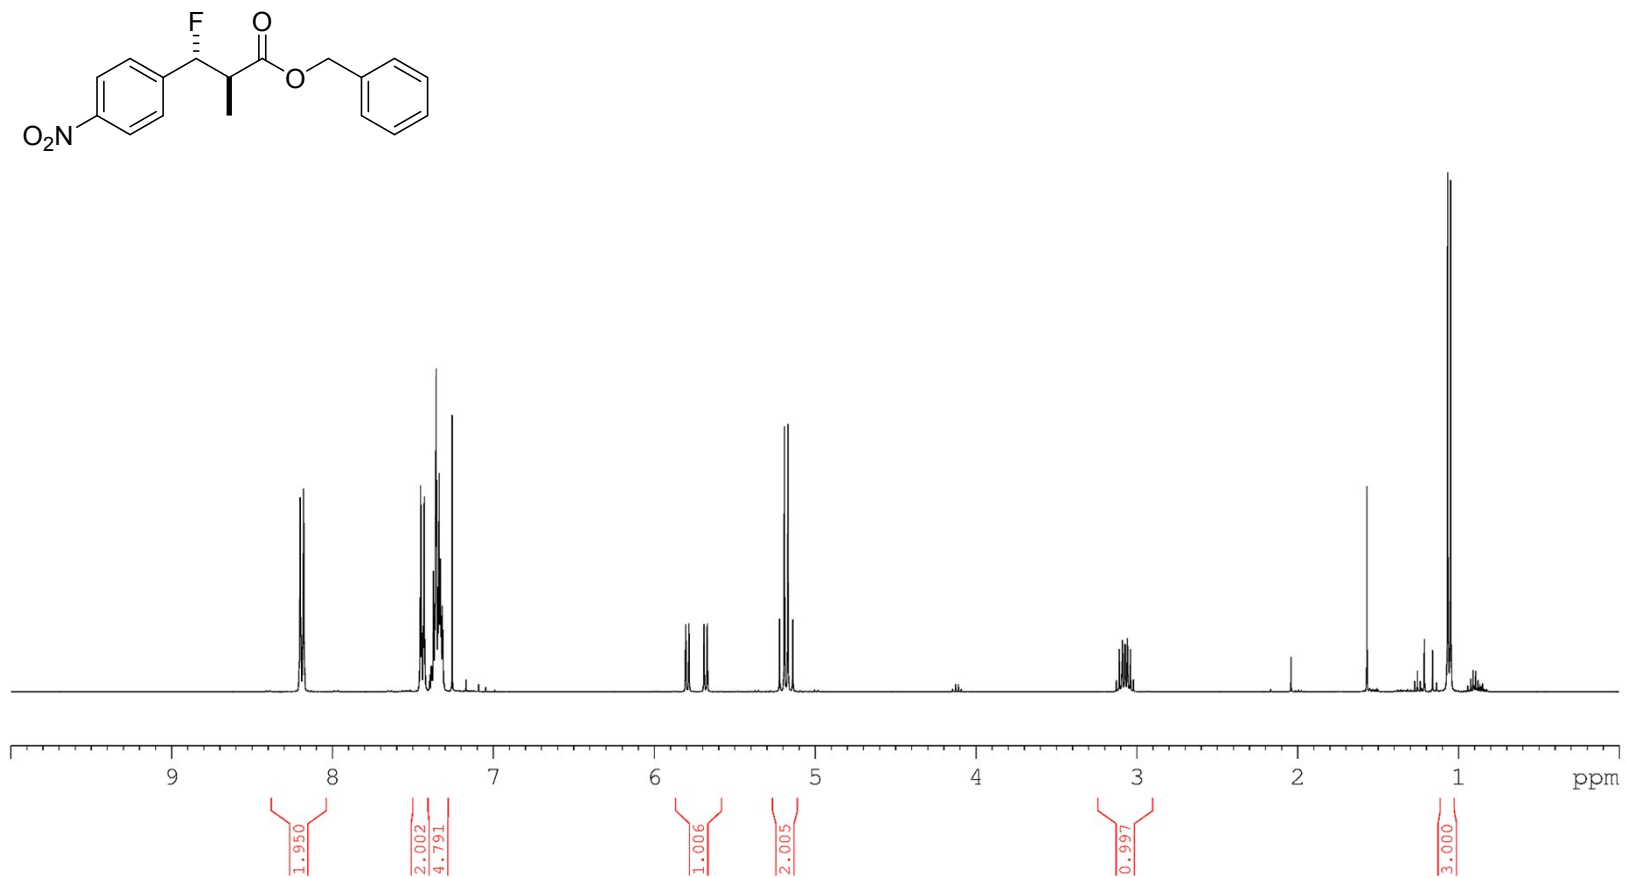



Figure S15.  $^{13}\text{C}$  NMR spectrum of *anti*-Benzyl 3-fluoro-2-methyl-3-(4-nitrophenyl)propanoate (**28**)

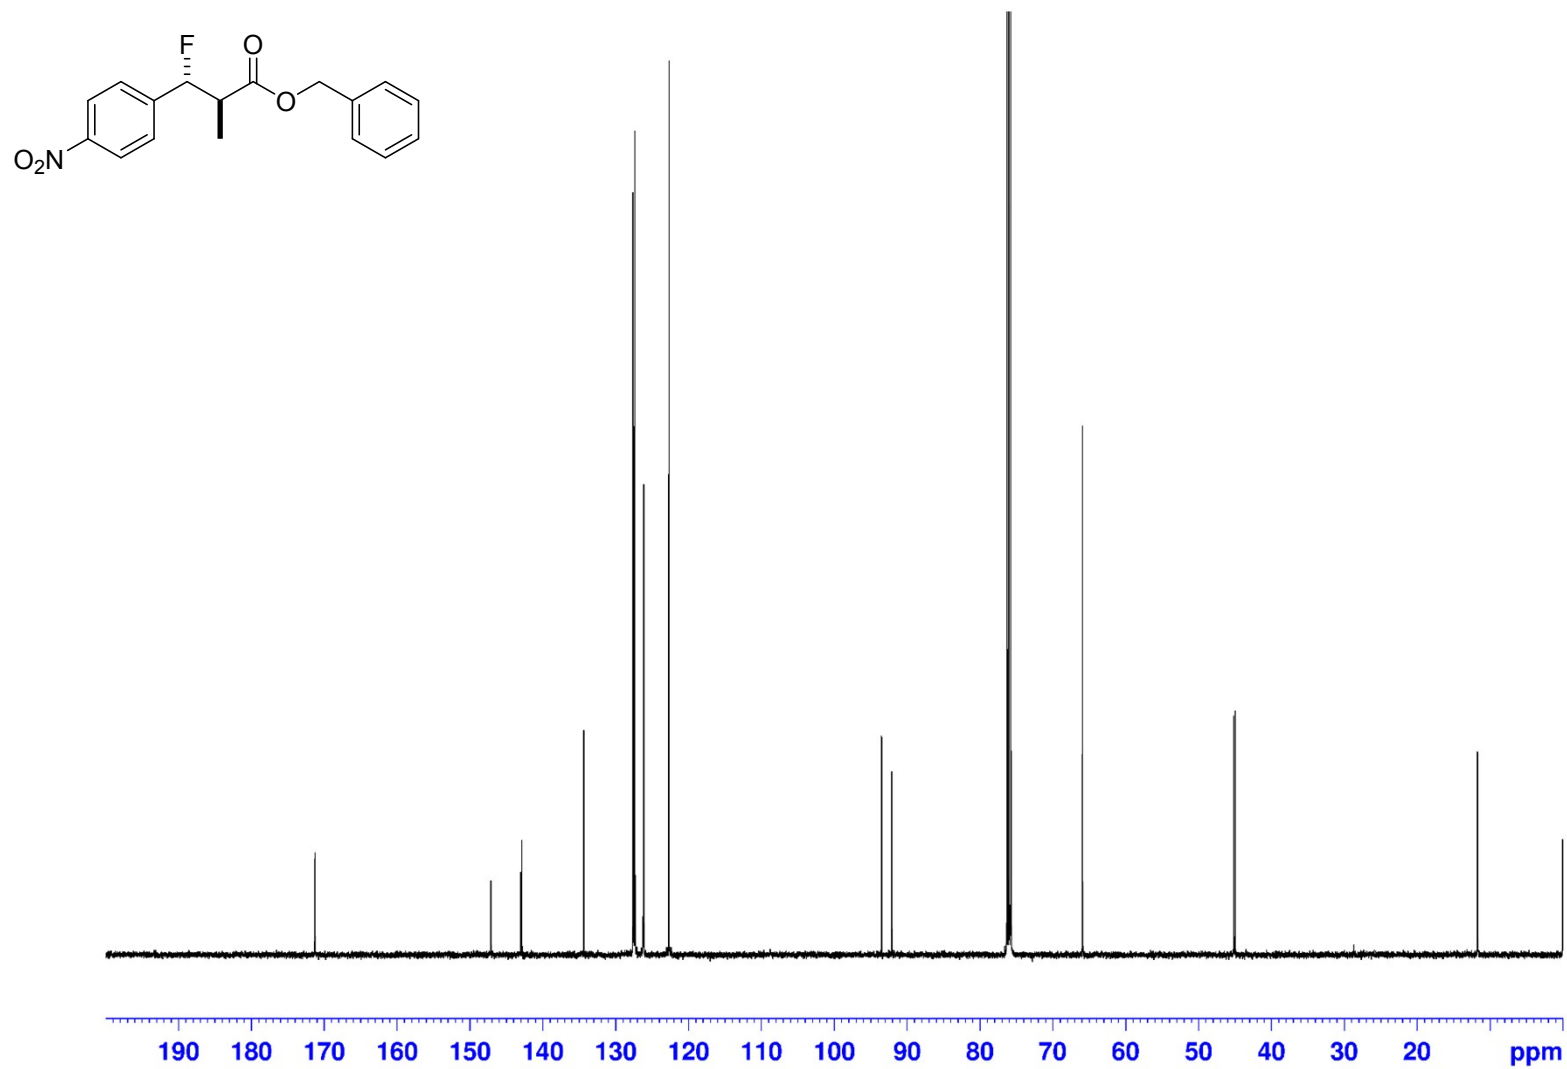

Figure S16.  $^{19}\text{F}$  NMR spectrum of *anti*-Benzyl 3-fluoro-2-methyl-3-(4-nitrophenyl)propanoate (**28**)

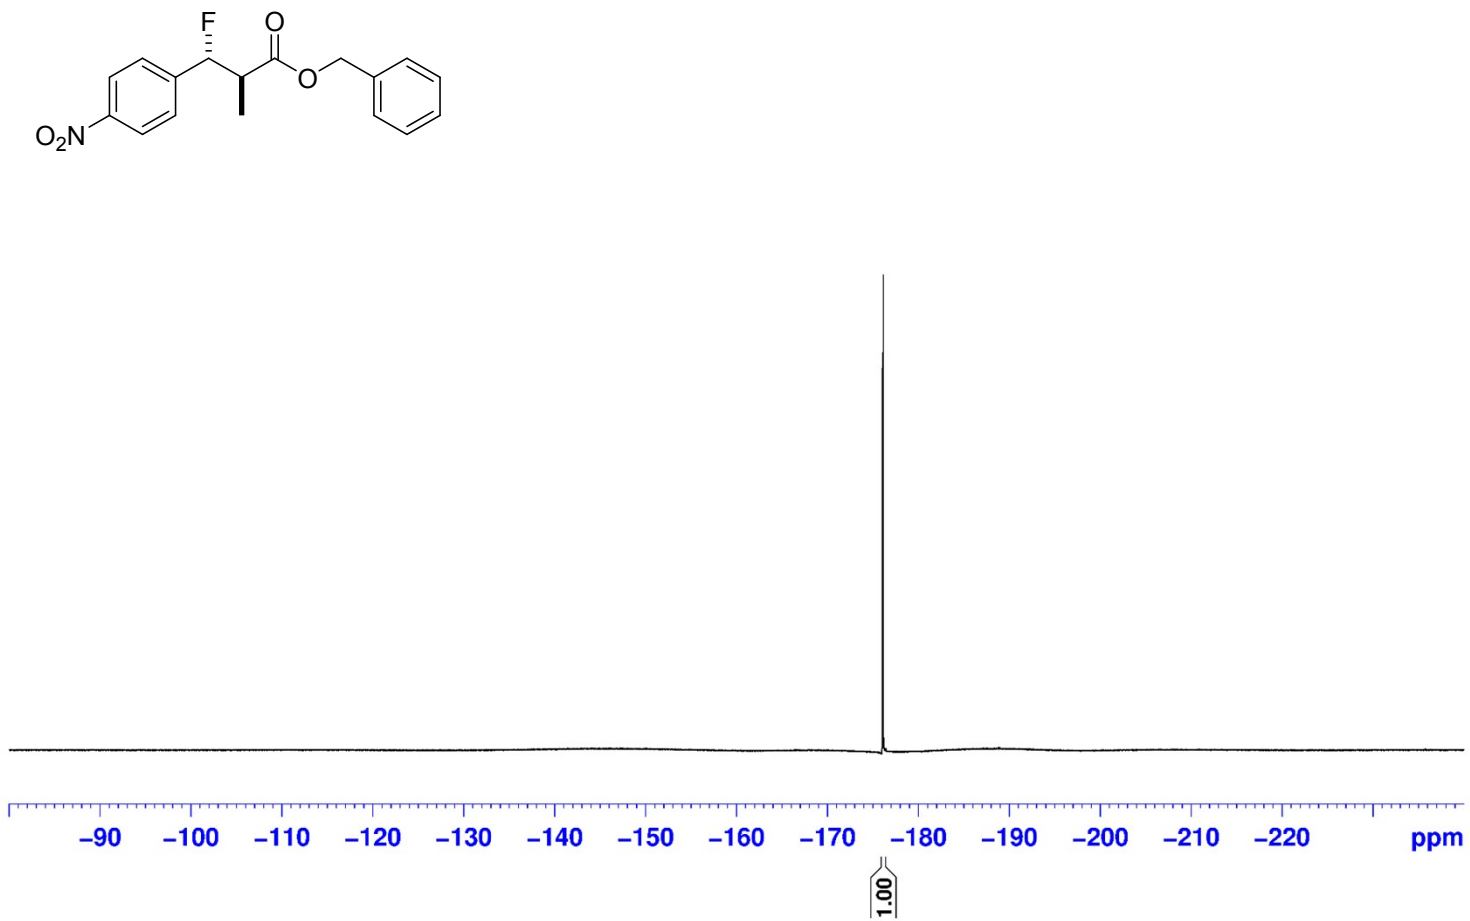

Figure S17.  $^1\text{H}$  NMR spectrum of *anti*-3-Fluoro-2-methyl-3-(4-nitrophenyl)propanoic acid (**29**)

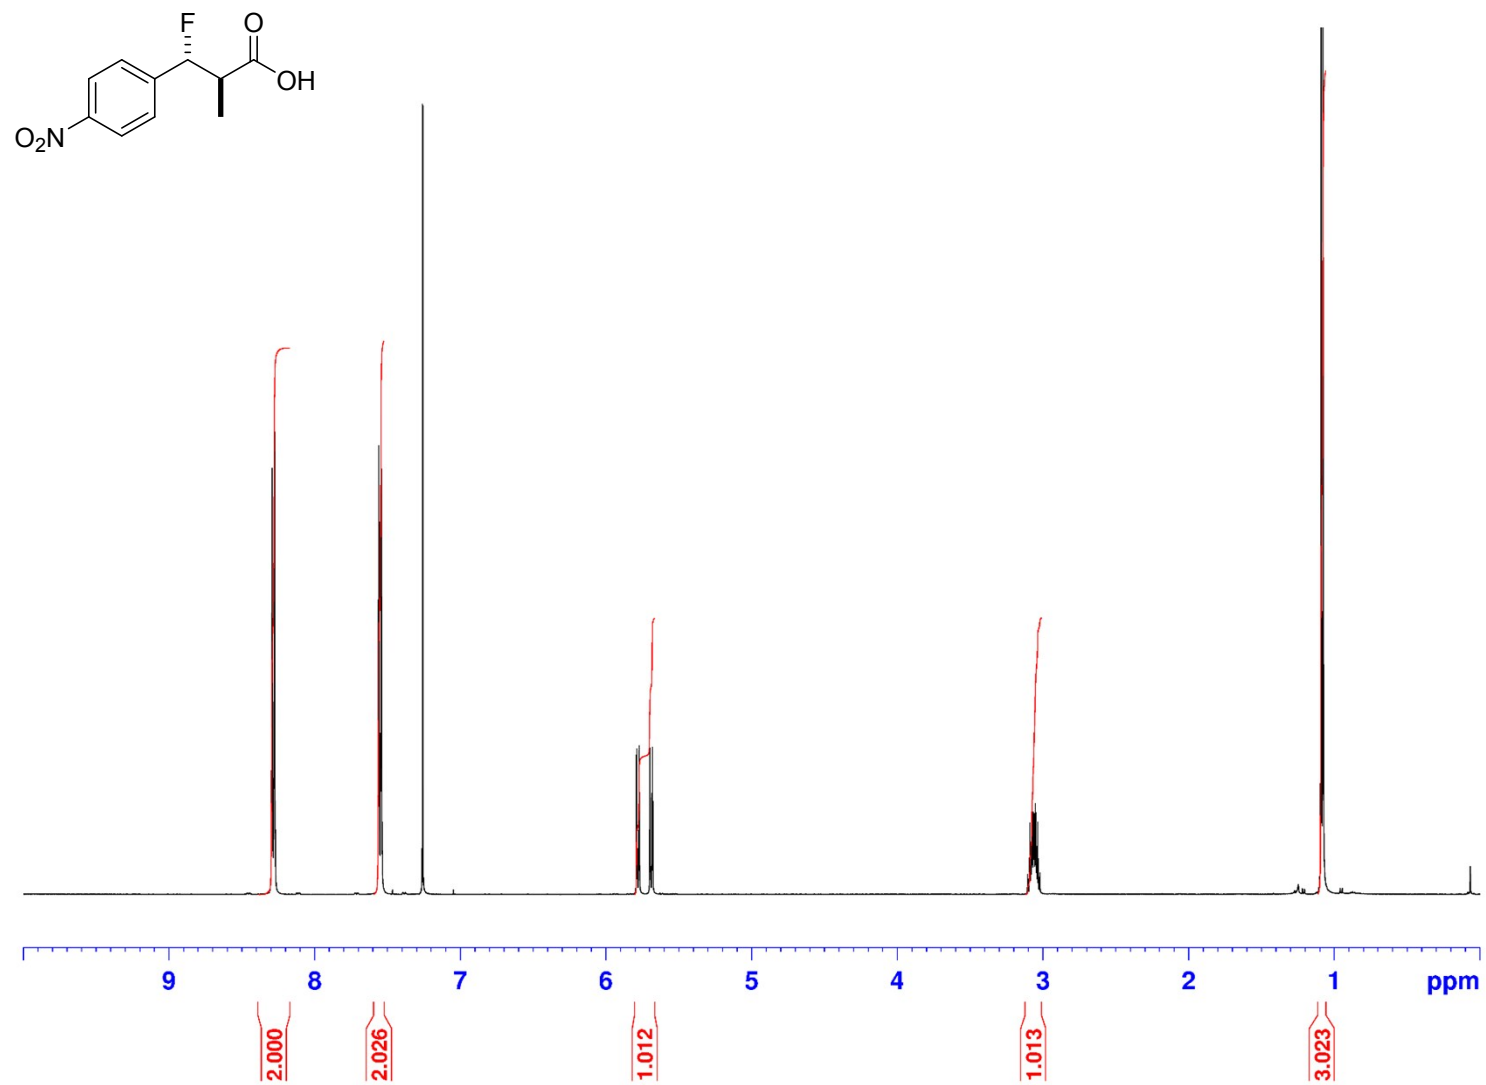

Figure S18.  $^{13}\text{C}$  NMR spectrum of *anti*-3-Fluoro-2-methyl-3-(4-nitrophenyl)propanoic acid (**29**)

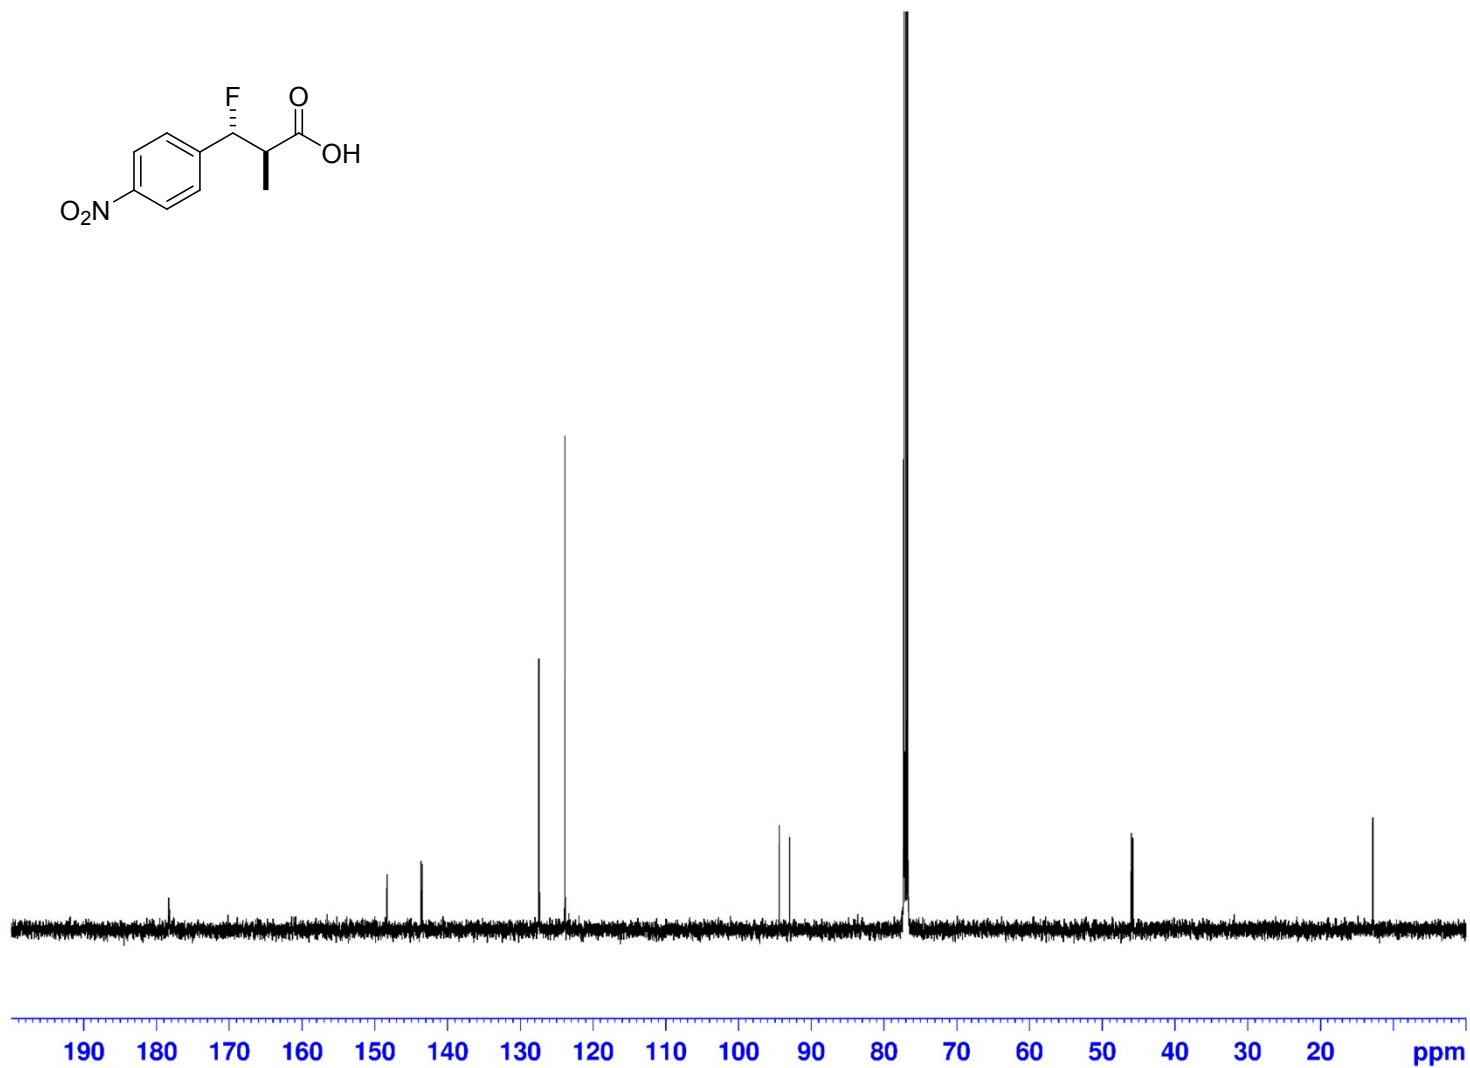

Figure S19.  $^{19}\text{F}$  NMR spectrum of *anti*-3-Fluoro-2-methyl-3-(4-nitrophenyl)propanoic acid (**29**)

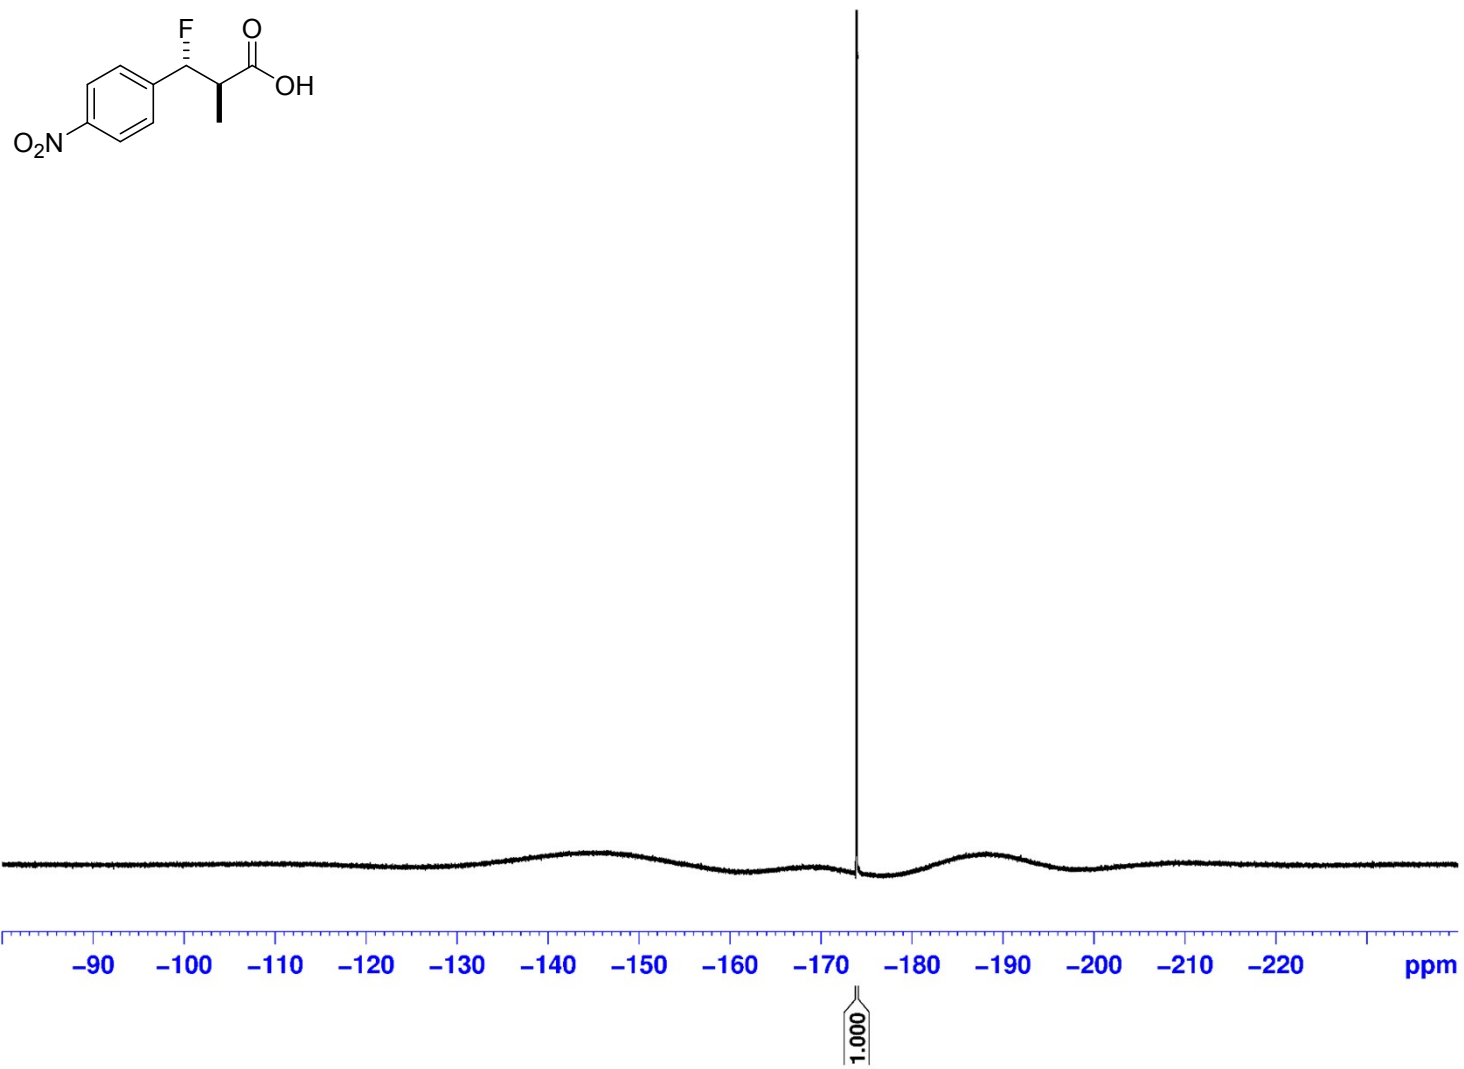

Figure S20.  $^1\text{H}$  NMR spectrum *anti*-3-Fluoro-2-methyl-3-(4-nitrophenyl)propanoyl-CoA (**30**)

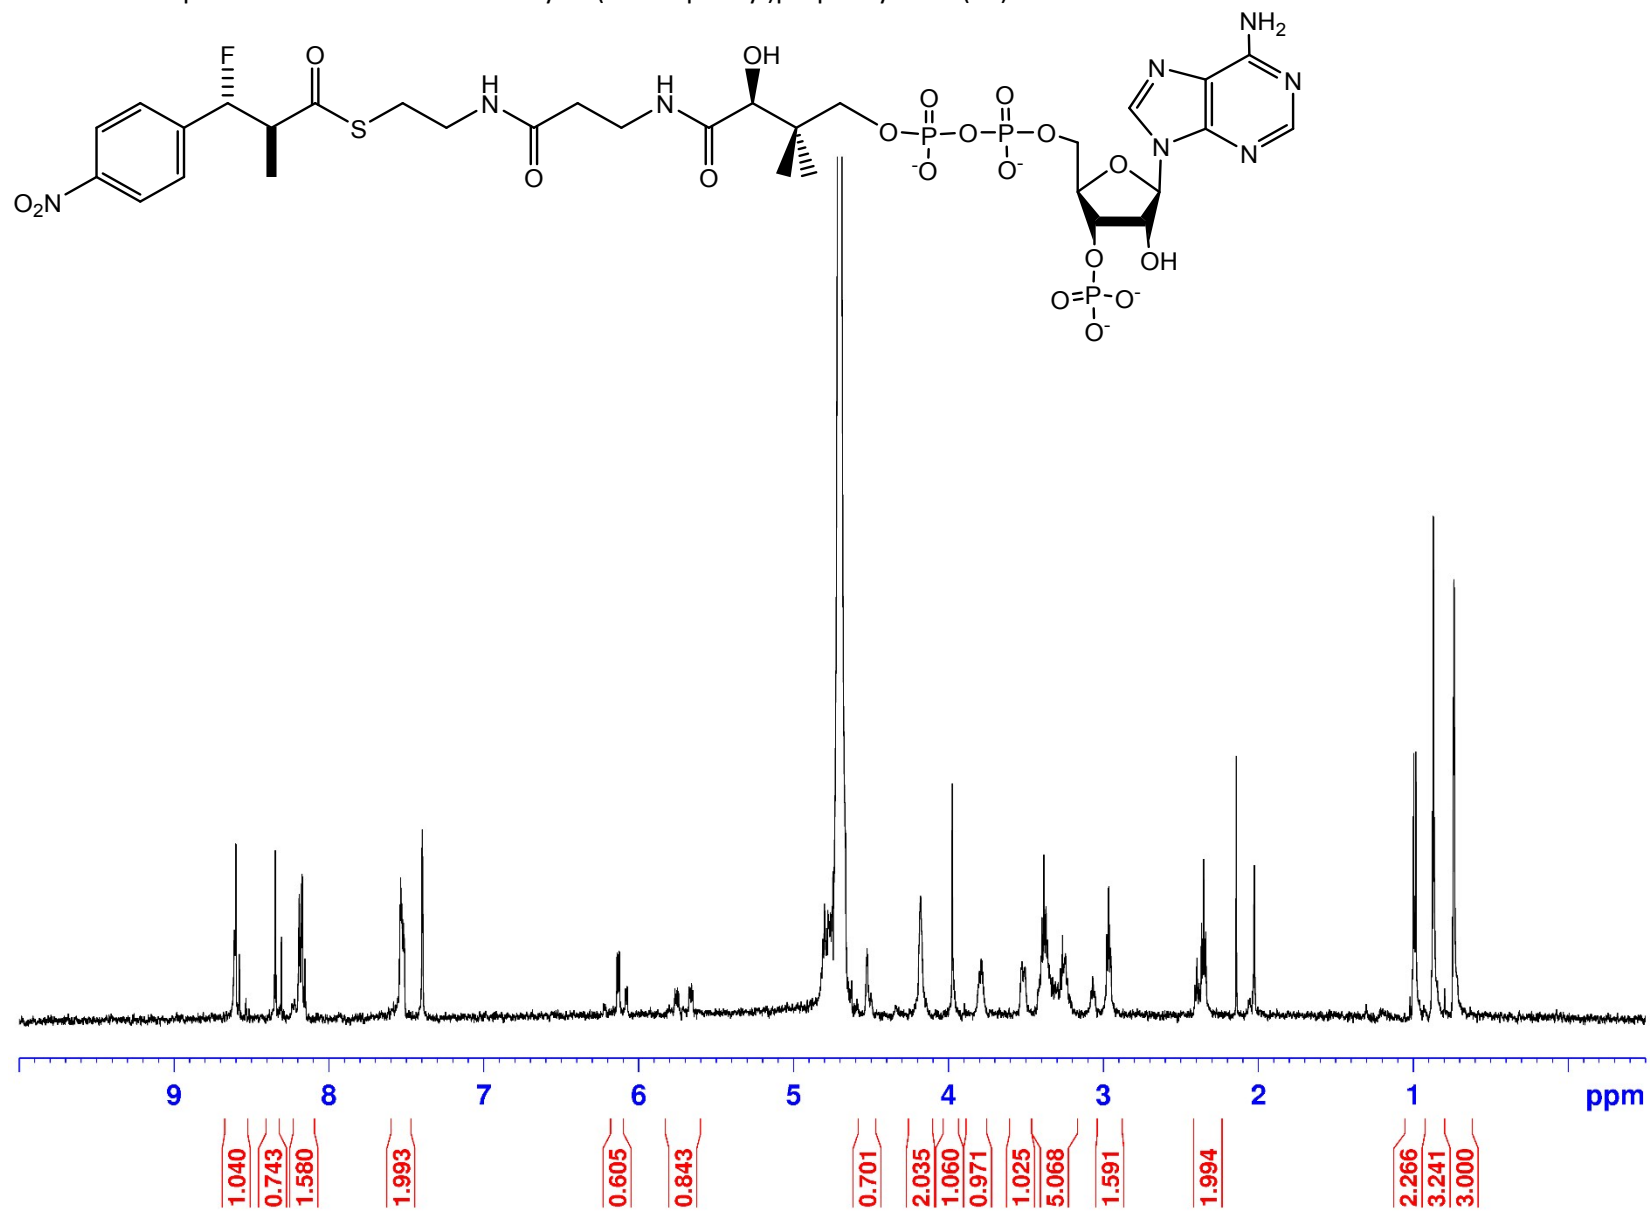

Figure S21.  $^{19}\text{F}$  NMR spectrum *anti*-3-Fluoro-2-methyl-3-(4-nitrophenyl)propanoyl-CoA (**30**)

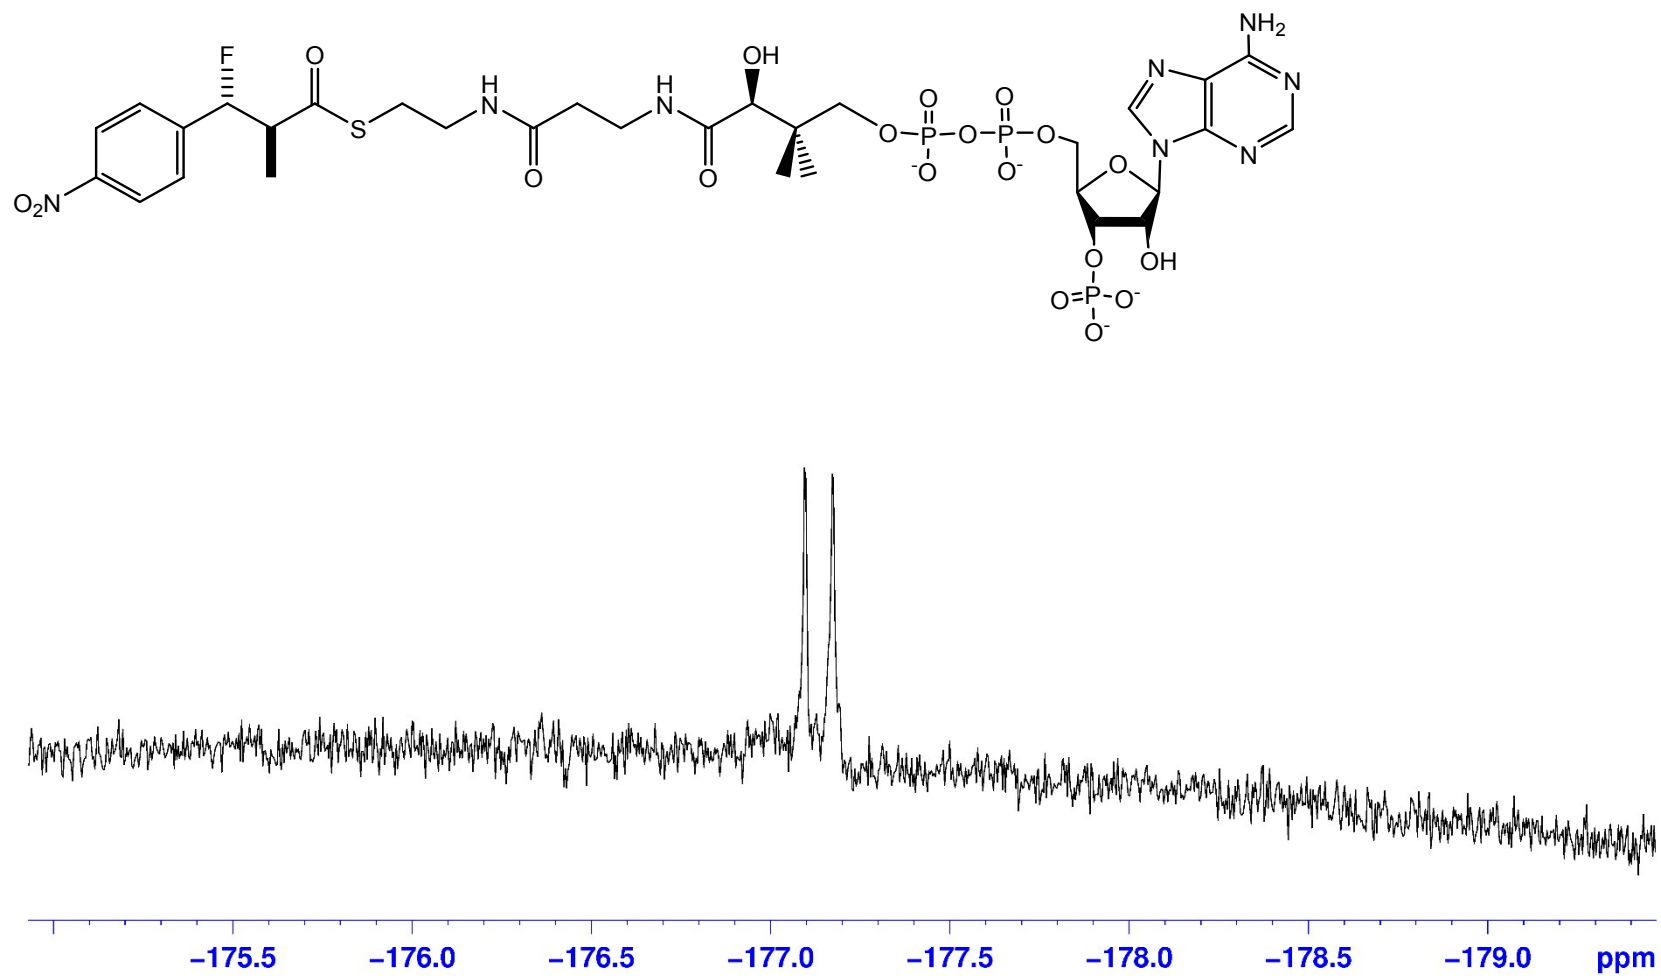

Figure S22. <sup>1</sup>H NMR spectrum of 2-(2-Hydroxyphenyl)-2,3-dihydroquinolin-4(1H)-one (**35**)

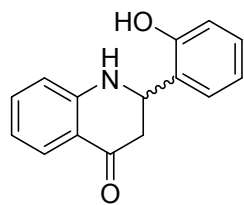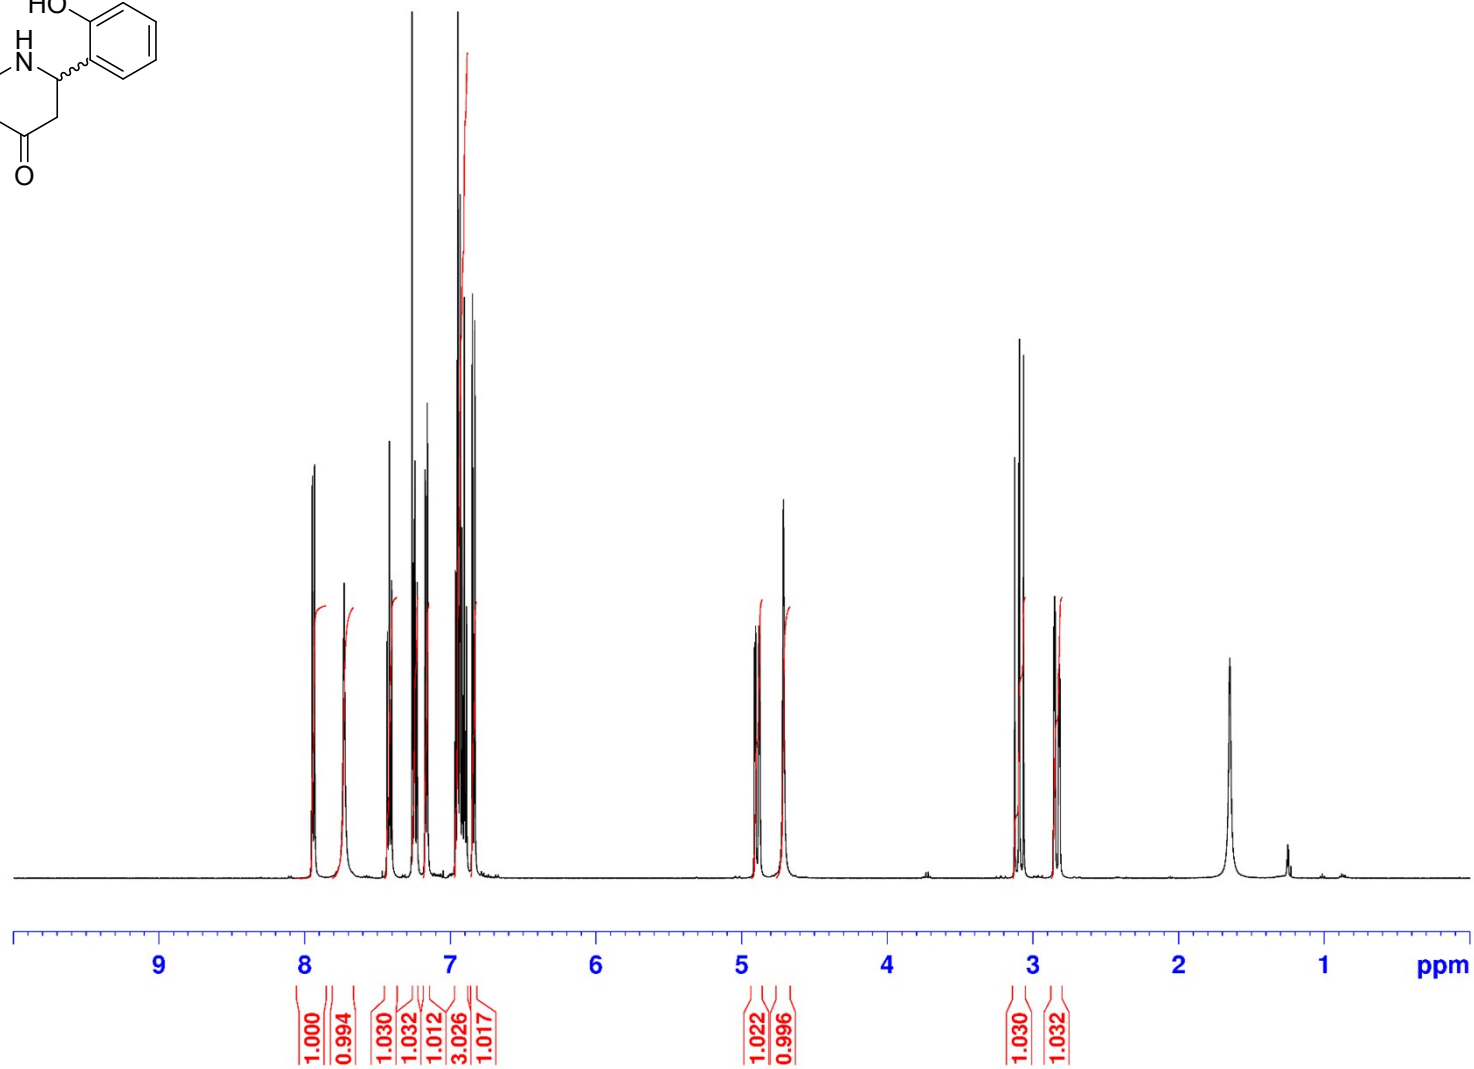



Figure S23.  $^{13}\text{C}$  NMR spectrum of 2-(2-Hydroxyphenyl)-2,3-dihydroquinolin-4(1H)-one (35)

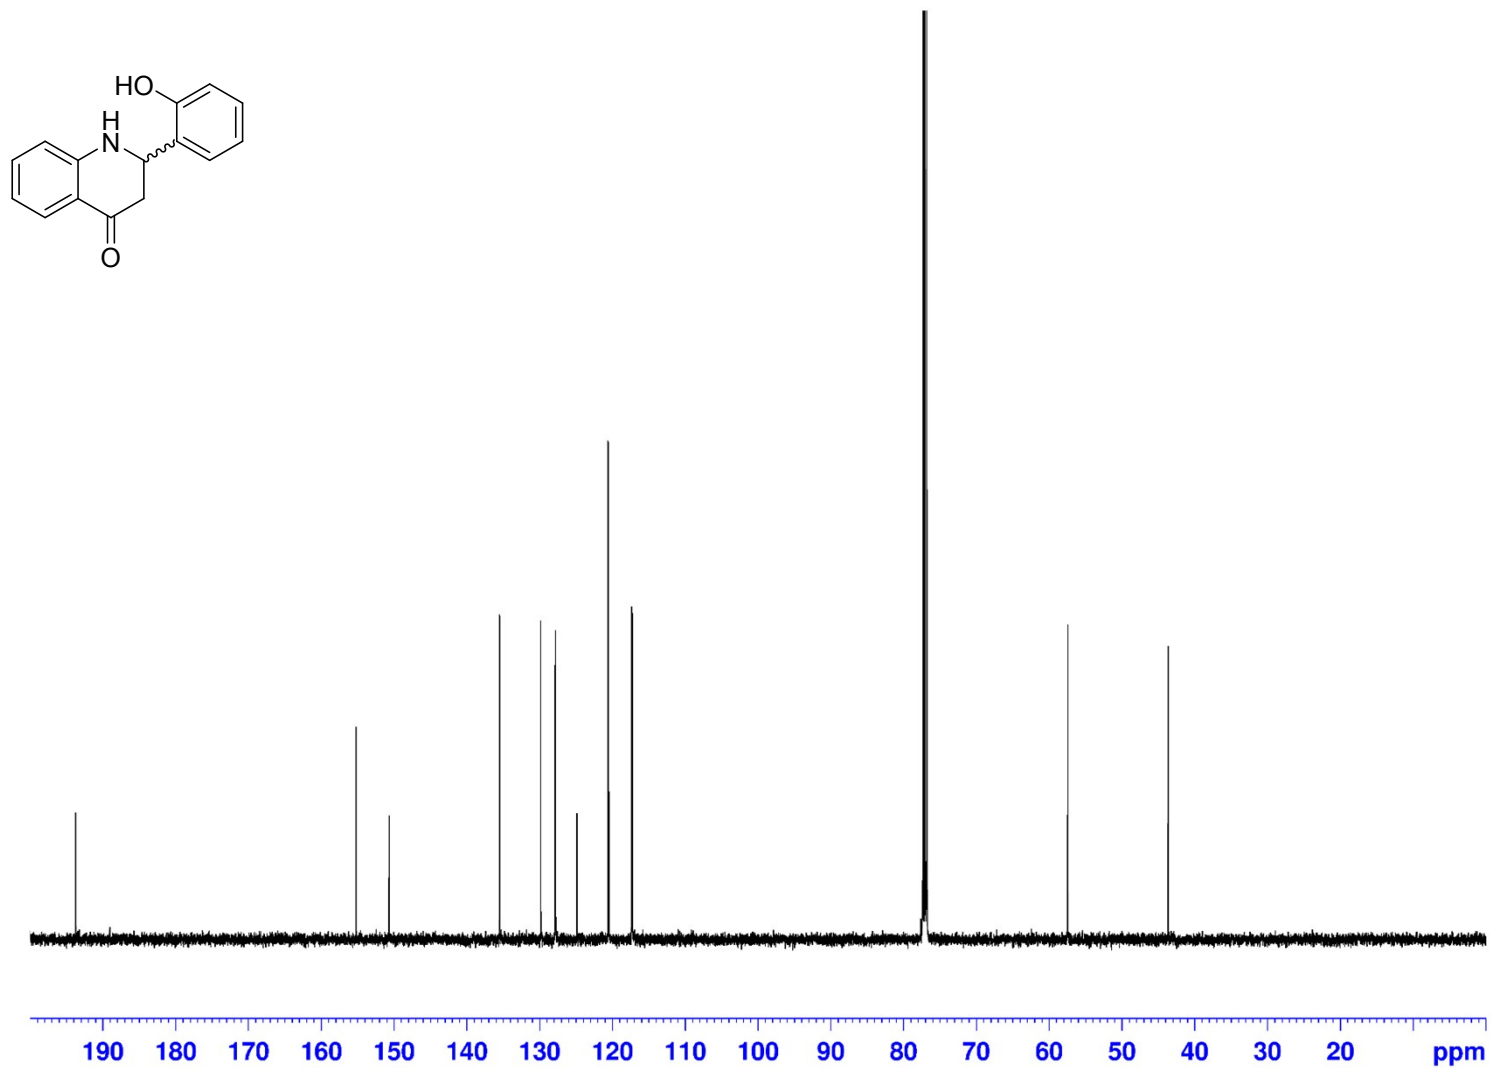

### Single Crystal X-Ray Crystallography Data

Single crystals of 2-(2-Hydroxyphenyl)-2,3-dihydroquinolin-4(1H)-one (**35**) were produced by dissolving hot ethanol followed by addition of petroleum ether. A crystal was mounted in inert oil and transferred to the cold gas stream of a Nonius Kappa CCD diffractometer. Intensity data were collected with MoK $\alpha$  radiation ( $\lambda = 0.71073 \text{ \AA}$ ) at  $T = 150(2) \text{ K}$ . Data were processed using the Nonius Software.<sup>1</sup> A symmetry related (multi-scan) absorption correction had been applied. The structure was solved with Sir97<sup>2</sup> followed by full-matrix least squares refinement on  $F^2$  using SHELXL-2013<sup>3</sup> implemented in the WINGX-1.80 suite of programmes throughout.<sup>4</sup> Crystal parameters and details on data collection, solution and refinement for the complexes are provided in Table S1.

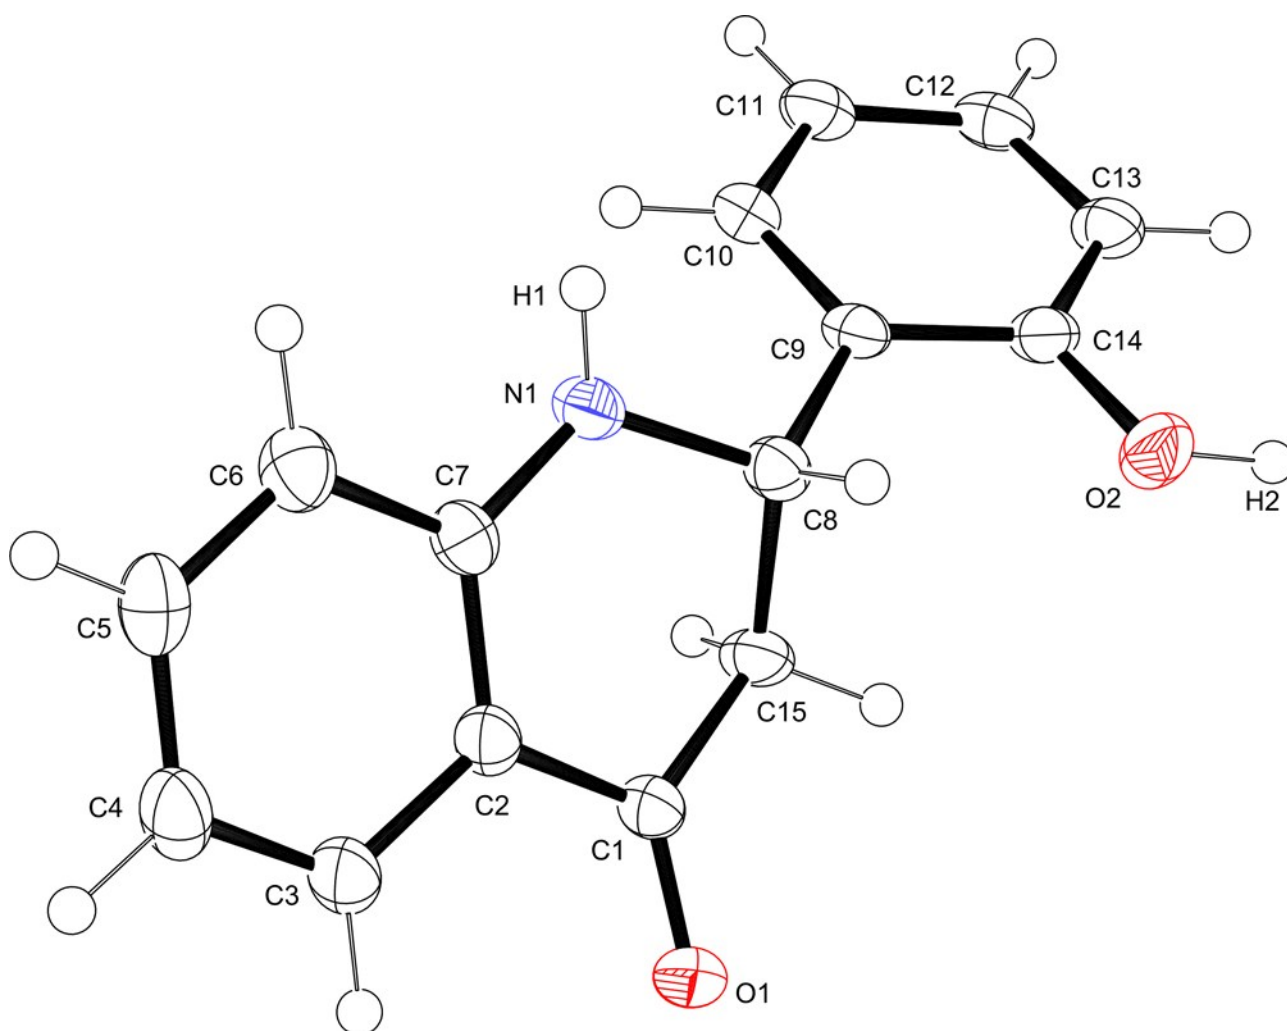

**Figure S24.** X-Ray crystal structure of 2-(2-Hydroxyphenyl)-2,3-dihydroquinolin-4(1H)-one (**35**) with ellipsoids shown at 50 % probability

Table S1. Crystal data and structure refinement for 2-(2-Hydroxyphenyl)-2,3-dihydroquinolin-4(1*H*)-one (35).

**X-Ray Parameters**

|                                   |                                                  |                    |
|-----------------------------------|--------------------------------------------------|--------------------|
| Empirical formula                 | C <sub>15</sub> H <sub>13</sub> N O <sub>2</sub> |                    |
| Formula weight                    | 239.26                                           |                    |
| Temperature                       | 150(2) K                                         |                    |
| Wavelength                        | 0.71073 Å                                        |                    |
| Crystal system                    | Triclinic                                        |                    |
| Space group                       | P -1                                             |                    |
| Unit cell dimensions              | a = 7.9496(2) Å                                  | α = 108.9192(9)°.  |
|                                   | b = 8.5205(2) Å                                  | β = 98.7190(10)°.  |
|                                   | c = 9.6732(2) Å                                  | γ = 103.0474(10)°. |
| Volume                            | 585.57(2) Å <sup>3</sup>                         |                    |
| Z                                 | 2                                                |                    |
| Density (calculated)              | 1.357 Mg/m <sup>3</sup>                          |                    |
| Absorption coefficient            | 0.091 mm <sup>-1</sup>                           |                    |
| F(000)                            | 252                                              |                    |
| Crystal size                      | 0.600 x 0.400 x 0.300 mm <sup>3</sup>            |                    |
| Theta range for data collection   | 3.732 to 30.062°.                                |                    |
| Index ranges                      | -11 ≤ h ≤ 10, -11 ≤ k ≤ 11, -13 ≤ l ≤ 13         |                    |
| Reflections collected             | 13540                                            |                    |
| Independent reflections           | 3395 [R(int) = 0.0467]                           |                    |
| Completeness to theta = 25.242°   | 99.5 %                                           |                    |
| Absorption correction             | Semi-empirical from equivalents                  |                    |
| Max. and min. transmission        | 0.975 and 0.793                                  |                    |
| Refinement method                 | Full-matrix least-squares on F <sup>2</sup>      |                    |
| Data / restraints / parameters    | 3395 / 0 / 171                                   |                    |
| Goodness-of-fit on F <sup>2</sup> | 1.063                                            |                    |
| Final R indices [I > 2σ(I)]       | R1 = 0.0463, wR2 = 0.1216                        |                    |
| R indices (all data)              | R1 = 0.0640, wR2 = 0.1323                        |                    |
| Extinction coefficient            | n/a                                              |                    |
| Largest diff. peak and hole       | 0.270 and -0.250 e.Å <sup>-3</sup>               |                    |

Table S2. Bond lengths [Å] and angles [°] for **35**.

---

|              |            |
|--------------|------------|
| N(1)-C(7)    | 1.3755(14) |
| N(1)-C(8)    | 1.4566(14) |
| N(1)-H(1)    | 0.884(17)  |
| O(1)-C(1)    | 1.2341(14) |
| O(2)-C(14)   | 1.3608(14) |
| O(2)-H(2)    | 0.95(2)    |
| C(1)-C(2)    | 1.4588(16) |
| C(1)-C(15)   | 1.5093(14) |
| C(2)-C(3)    | 1.4068(15) |
| C(2)-C(7)    | 1.4072(16) |
| C(3)-C(4)    | 1.3736(18) |
| C(3)-H(3)    | 0.9500     |
| C(4)-C(5)    | 1.4021(19) |
| C(4)-H(4)    | 0.9500     |
| C(5)-C(6)    | 1.3751(17) |
| C(5)-H(5)    | 0.9500     |
| C(6)-C(7)    | 1.4101(16) |
| C(6)-H(6)    | 0.9500     |
| C(8)-C(9)    | 1.5137(14) |
| C(8)-C(15)   | 1.5332(15) |
| C(8)-H(8)    | 1.0000     |
| C(9)-C(10)   | 1.3906(15) |
| C(9)-C(14)   | 1.3995(15) |
| C(10)-C(11)  | 1.3913(16) |
| C(10)-H(10)  | 0.9500     |
| C(11)-C(12)  | 1.3870(17) |
| C(11)-H(11)  | 0.9500     |
| C(12)-C(13)  | 1.3892(17) |
| C(12)-H(12)  | 0.9500     |
| C(13)-C(14)  | 1.3983(15) |
| C(13)-H(13)  | 0.9500     |
| C(15)-H(15A) | 0.9900     |
| C(15)-H(15B) | 0.9900     |

---

Table S3. Bond angles [°] for **35**.

---

|                   |            |
|-------------------|------------|
| C(7)-N(1)-C(8)    | 120.02(9)  |
| C(7)-N(1)-H(1)    | 113.9(10)  |
| C(8)-N(1)-H(1)    | 115.1(10)  |
| C(14)-O(2)-H(2)   | 110.7(11)  |
| O(1)-C(1)-C(2)    | 122.52(10) |
| O(1)-C(1)-C(15)   | 121.62(10) |
| C(2)-C(1)-C(15)   | 115.76(9)  |
| C(3)-C(2)-C(7)    | 119.93(10) |
| C(3)-C(2)-C(1)    | 120.32(10) |
| C(7)-C(2)-C(1)    | 119.73(9)  |
| C(4)-C(3)-C(2)    | 120.94(12) |
| C(4)-C(3)-H(3)    | 119.5      |
| C(2)-C(3)-H(3)    | 119.5      |
| C(3)-C(4)-C(5)    | 118.99(11) |
| C(3)-C(4)-H(4)    | 120.5      |
| C(5)-C(4)-H(4)    | 120.5      |
| C(6)-C(5)-C(4)    | 121.22(11) |
| C(6)-C(5)-H(5)    | 119.4      |
| C(4)-C(5)-H(5)    | 119.4      |
| C(5)-C(6)-C(7)    | 120.42(11) |
| C(5)-C(6)-H(6)    | 119.8      |
| C(7)-C(6)-H(6)    | 119.8      |
| N(1)-C(7)-C(2)    | 121.70(10) |
| N(1)-C(7)-C(6)    | 119.84(10) |
| C(2)-C(7)-C(6)    | 118.42(10) |
| N(1)-C(8)-C(9)    | 111.15(9)  |
| N(1)-C(8)-C(15)   | 108.70(9)  |
| C(9)-C(8)-C(15)   | 109.39(9)  |
| N(1)-C(8)-H(8)    | 109.2      |
| C(9)-C(8)-H(8)    | 109.2      |
| C(15)-C(8)-H(8)   | 109.2      |
| C(10)-C(9)-C(14)  | 118.59(9)  |
| C(10)-C(9)-C(8)   | 122.25(10) |
| C(14)-C(9)-C(8)   | 119.05(10) |
| C(9)-C(10)-C(11)  | 121.42(10) |
| C(9)-C(10)-H(10)  | 119.3      |
| C(11)-C(10)-H(10) | 119.3      |
| C(12)-C(11)-C(10) | 119.53(11) |

|                     |            |
|---------------------|------------|
| C(12)-C(11)-H(11)   | 120.2      |
| C(10)-C(11)-H(11)   | 120.2      |
| C(11)-C(12)-C(13)   | 120.03(10) |
| C(11)-C(12)-H(12)   | 120.0      |
| C(13)-C(12)-H(12)   | 120.0      |
| C(12)-C(13)-C(14)   | 120.16(11) |
| C(12)-C(13)-H(13)   | 119.9      |
| C(14)-C(13)-H(13)   | 119.9      |
| O(2)-C(14)-C(13)    | 122.53(10) |
| O(2)-C(14)-C(9)     | 117.28(9)  |
| C(13)-C(14)-C(9)    | 120.19(10) |
| C(1)-C(15)-C(8)     | 113.40(9)  |
| C(1)-C(15)-H(15A)   | 108.9      |
| C(8)-C(15)-H(15A)   | 108.9      |
| C(1)-C(15)-H(15B)   | 108.9      |
| C(8)-C(15)-H(15B)   | 108.9      |
| H(15A)-C(15)-H(15B) | 107.7      |

---

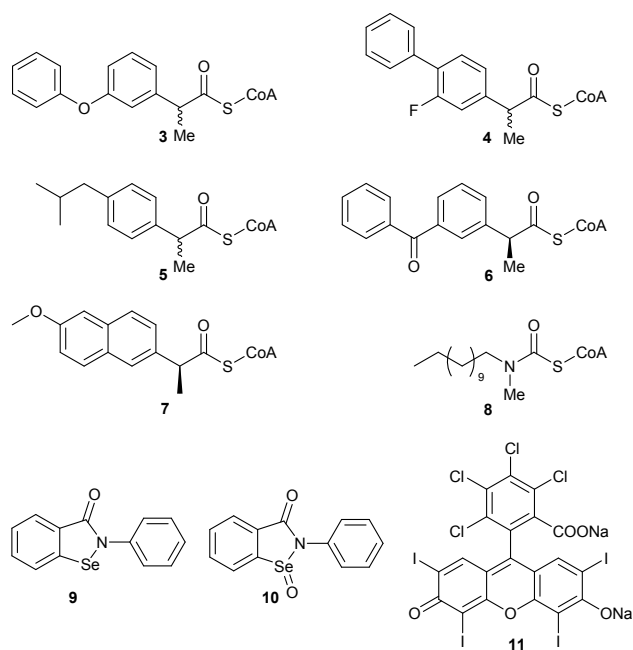

| Inhibitor | Substrate conversion in positive control | Substrate conversion in presence of inhibitor | Reduction caused by inhibitor | Average reduction caused by inhibitor |
|-----------|------------------------------------------|-----------------------------------------------|-------------------------------|---------------------------------------|
| <b>3</b>  | 56.2%                                    | 42.3%; 41.9%                                  | 13.9%; 14.3%                  | 14.10 ± 0.098%                        |
| <b>4</b>  | 42.2%                                    | 38.1%; 39.2%                                  | 4.1%; 3.0%                    | 3.55 ± 0.029%                         |
| <b>5</b>  | 56.2%                                    | 44.5%; 38.8%                                  | 11.7%; 17.4%                  | 14.55 ± 0.082%                        |
| <b>6</b>  | 56.2%                                    | 55.2%; 48.3%                                  | 1.0%; 7.9%                    | 4.45 ± 0.007%                         |
| <b>7</b>  | 42.2%                                    | 36.2%; 38.6%                                  | 6.0%; 3.6%                    | 4.80 ± 0.042%                         |
| <b>8</b>  | 56.2%                                    | 8.7%; 10.2%                                   | 47.5%; 46.0%                  | 46.75 ± 0.335%                        |
| <b>9</b>  | 42.2%                                    | -0.1%; -1.1%                                  | 42.3%; 43.3%                  | 42.80 ± 0.299%                        |
| <b>10</b> | 45.4%                                    | 38.3%; 41.8%                                  | 7.1%; 3.6%                    | 5.35 ± 0.050%                         |
| <b>11</b> | 45.4%                                    | 0.5%; 0.4%                                    | 44.9%; 45.0%                  | 44.95 ± 0.317%                        |

**Table S1.** Inhibition of AMACR activity by various known drugs. Substrate (3*R*,2*R*-3-fluoro-2-methyldecanoyl-CoA **1**) was at a final concentration of 100  $\mu$ M and enzyme at a final concentration of 60  $\mu$ g mL<sup>-1</sup> (1.27 nM). Average reduction caused by inhibitor is mean  $\pm$  standards deviation of the sample (calculated using Excel 2013).

## Fluorescence Data

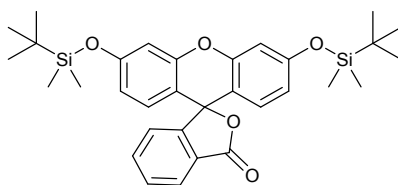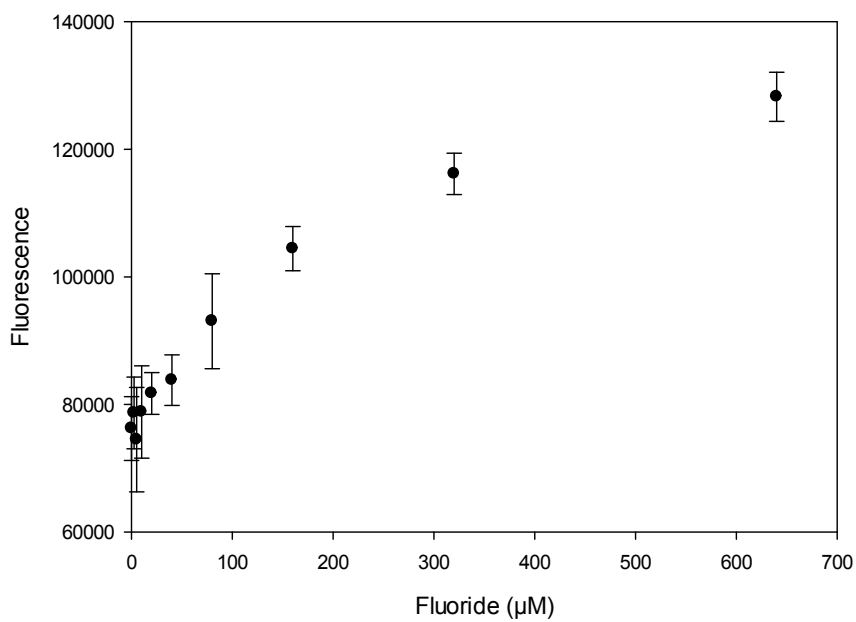

**Figure S25:** Titration of fluoride (from sodium fluoride) in 50 mM Tris-HCl, pH 7.4 with sensor **33** in DMSO [1:4 (v/v)]. Concentrations of fluoride are for during the incubation with sensor **33** before addition of HEPES-NaOH and fluorescence measurement. The concentration of sensor **33** during the incubation with fluoride was 256  $\mu\text{M}$ . Readings are average of 12 replicants  $\pm$  standard deviation of the population.



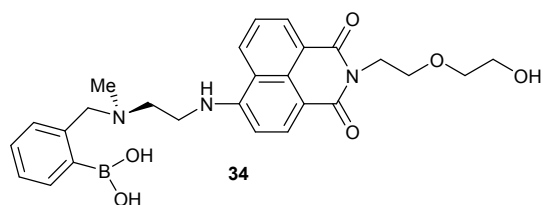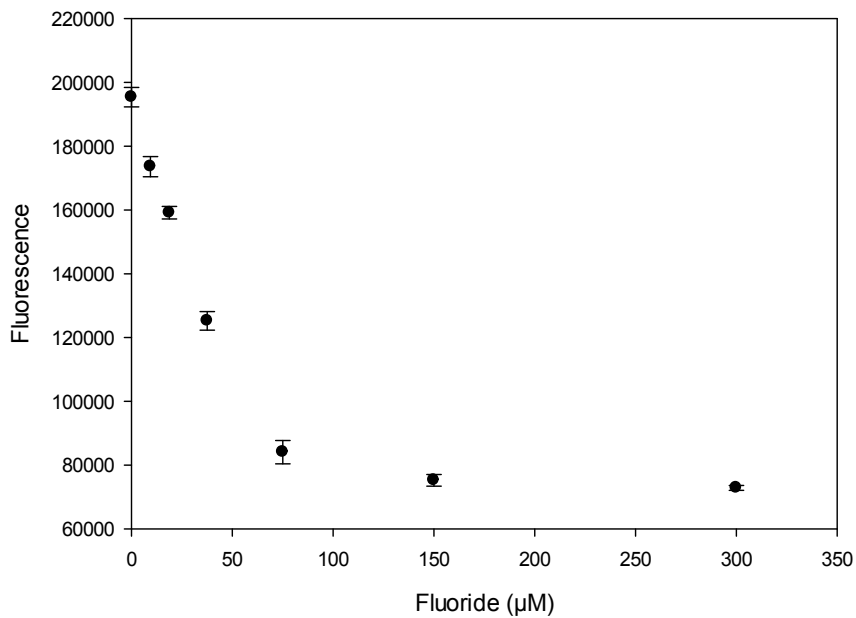

**Figure S26:** Titration of fluoride (from tert-n-butylammonium fluoride) with sensor **34** in 100% acetonitrile. Concentrations of fluoride are for during the incubation with sensor **34**. The concentration of sensor **34** during incubation with fluoride was 2  $\mu\text{M}$ . Readings are average of 6 replicants  $\pm$  standard deviation of the population.

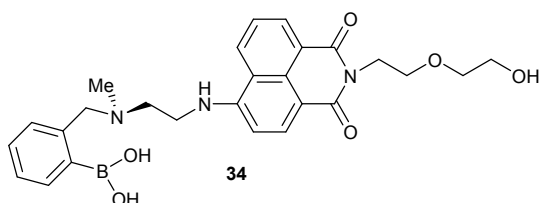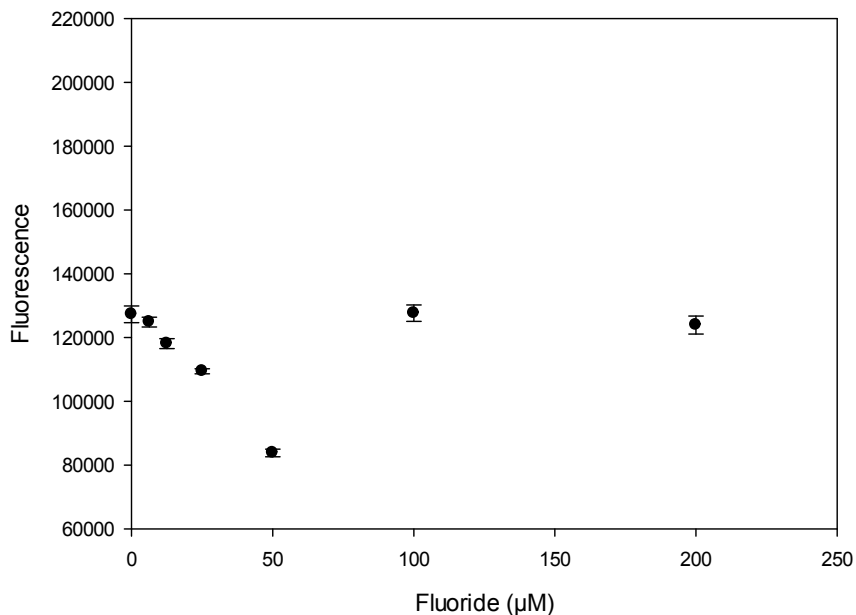

**Figure S27:** Titration of fluoride (from sodium fluoride) with sensor **34** in 2.5 mM NaH<sub>2</sub>PO<sub>4</sub>-NaOH, pH 7.4 in acetonitrile/H<sub>2</sub>O [19:1 (v/v)]. Concentrations of fluoride are for during the incubation with sensor **34**. The concentration of sensor **34** during incubation with fluoride was 2 μM. Readings are average of 6 replicants ± standard deviation of the population.

## References

1. Z. Otwinowski and W. Minor, in *Methods in Enzymology, Macromolecular Crystallography, Pt A*, 1997, **276**, pp. 307-326, Academic Press.
2. Altomare, M. C. Burla, M. Camalli, G. L. Cascarano, C. Giacovazzo, A. Guagliardi, A. G. G. Moliterni, G. Polidori and R. Spagna, *J. Appl. Cryst.*, 1999, **32**, 115-119.
3. G. M. Sheldrick, *Acta Cryst. Section A*, 2008, **64**, 112-122.
4. L. J. Farrugia, *J. Appl. Cryst.*, 1999, **32**, 837-838.
